1 Cerebellum regulates the timing of periaqueductal grey neural encoding of fear memory and  
2 the expression of fear conditioned behaviours.  
3

4

5 Authors: \*Lawrenson CL<sup>1</sup>, \*Paci E<sup>1</sup>, Drake RAR<sup>1</sup>, Lumb BM<sup>1</sup>, Apps R<sup>1</sup>

6

7 Affiliation: <sup>1</sup> School of Physiology, Pharmacology & Neuroscience, University of Bristol, UK

8

9 Contributions: \*Joint first author.

10

11 **Abstract:**

12

13 The pivotal role of the periaqueductal grey (PAG) in fear learning is reinforced by the identification of  
14 neurons in rat ventral (vPAG) that encode fear memory through signalling the onset and offset of an  
15 auditory conditioned stimulus during retrieval. Within this framework, understanding of cerebellar  
16 contributions to survival circuits is advanced by the discovery that: (i) reversible inactivation of the  
17 medial cerebellar nucleus (MCN) during fear consolidation (a) reduces the temporal precision of vPAG  
18 offset, but not onset responses and (b) increases rearing behaviour during retrieval, and (ii)  
19 chemogenetic inhibition of the MCN-vPAG projection during fear acquisition (a) reduces the emission  
20 of fear-related ultrasonic vocalisations and (b) slows the extinction rate of fear-related freezing. These  
21 findings show that the cerebellum regulates fear memory processes at multiple timescales and in  
22 multiple ways. The current findings indicate that dysfunctional interactions in the cerebellar-survival  
23 network may underlie fear-related disorders and comorbidities.

24

25 **Impact Statement:**

26 Cerebellar-periaqueductal grey interactions contribute to fear conditioned processes and, as such,  
27 provide a novel target for treating psychological conditions including post-traumatic stress disorder.

## 1 Introduction

2

3 The periaqueductal grey (PAG) lies at the hub of central networks that co-ordinate survival, including  
4 coping behaviours; from those subserving homeostatic and reproductive functions to those mediating  
5 defensive, fear-evoked coping responses. Neurons in the functionally distinct longitudinal columns of  
6 the PAG co-ordinate different aspects of survival behaviours. Of particular relevance to the current  
7 study, fear-evoked freezing is mediated by neurons in its ventral sector (vPAG; Vianna *et al.*, 2001;  
8 Walker and Carrive, 2003; Tovote *et al.*, 2016; Watson *et al.*, 2016). Fear-related behaviours co-  
9 ordinated by the PAG also extend to the expression of 22kHz ultrasonic vocalizations (USVs; Kim *et al.*,  
10 2013; Ouda *et al.*, 2016) and risk assessment activity such as rearing (Sandner *et al.*, 1987; Clelland *et al.*,  
11 2010). Furthermore, at a cellular level, electrophysiological studies have found that neurons in  
12 vPAG encode associatively conditioned fear memory (Watson *et al.*, 2016; Wright *et al.*, 2019).

13 Central nervous system survival networks involving the PAG are well documented (Tovote *et al.*, 2015).  
14 Until recently, the cerebellum was generally considered not to be part of this network. However, there  
15 is good evidence in cats and rodents that vermal regions of the cerebellum contribute to motor and  
16 autonomic components of defensive states; inactivation of vermal cerebellar cortex (lobules IV-VIII),  
17 or one of its main output nuclei (medial cerebellar nucleus, MCN, aka fastigial nucleus), leads to  
18 deficits in fear-related behaviours such as context conditioned bradycardia (Supple *et al.*, 1990); the  
19 expression of innate fear (Supple *et al.*, 1987; Koutsikou *et al.*, 2014); and also fear conditioned  
20 freezing behaviour (Asdourian *et al.*, 1970; Albert *et al.*, 1985; Sacchetti *et al.*, 2005; Koutsikou *et al.*,  
21 2014). In addition, the emission of USVs has been related to cerebellar function (Fujita *et al.*, 2008;  
22 Fujita-Jimbo *et al.*, 2014; Toledo *et al.*, 2019), and inactivation of the cerebellar vermis during innate  
23 and conditioned fear unmasks risk assessment rearing behaviour (Koutsikou *et al.*, 2014).

24 The cerebellum is reciprocally connected to many brain regions associated with survival networks  
25 (Sacchetti *et al.*, 2009; Strick *et al.*, 2009; Apps & Strata, 2015) and in all mammalian species studied  
26 so far (cat, rabbit, rat, mouse, human), this includes interconnections with the vPAG (Whiteside *et al.*,  
27 1953; Teune *et al.*, 2000; Nisimaru *et al.*, 2013; Koutsikou *et al.*, 2014; Cacciola *et al.*, 2019; Vaaga *et al.*,  
28 2020; Frontera *et al.*, 2020). Thus, the dependence of survival behaviours on the integrity of the  
29 cerebellum, together with reciprocal connections between the vPAG and the cerebellum raise the  
30 possibility of an important role of cerebellar interactions with the PAG in the expression of such  
31 behaviours.

32 In particular, an emerging concept is that the cerebellar vermis and its output nucleus MCN are  
33 involved in the control of an integrated array of fear-related functions, including fear memory and

1 fear-induced behaviours such as freezing. Important insights into the role of the murine MCN-vPAG  
2 pathway in modulating vPAG fear learning and memory have been provided recently (Vaaga et al.,  
3 2020; Frontera et al., 2020). However, it is not known whether PAG neural encoding of fear memory  
4 is dependent on the integrity of its cerebellar input. More generally, given the well-established role of  
5 the cerebellum in the co-ordination of movements and in particular, the representation of temporal  
6 relationships (e.g. Xu et al., 2006; Koch et al., 2007; Bares et al., 2007; Spencer & Ivry, 2013; Johansson  
7 et al., 2016) it remains to be determined whether the cerebellum enables the survival circuit network  
8 to elicit behaviourally appropriate responses at different times during fear conditioning. Effects during  
9 retrieval and extinction of a fear conditioned response are of particular interest because deficits in  
10 extinction processes are thought to underly psychological conditions such as post-traumatic stress  
11 disorder (Bremner et al., 1999; Herry et al., 2010; Milad et al., 2012) and have also been related to  
12 chronic pain phenotype (Ji et al., 2018).

13 The experiments reported here used a combination of electrophysiological, behavioural and  
14 interventionist approaches in an auditory cued fear conditioning paradigm in rats to interrogate the  
15 role of MCN interactions with the vPAG in the expression of fear-related behaviours. Our main findings  
16 are that: (i) vPAG encodes temporally precise information about the onset and offset of a fear  
17 conditioned stimulus and that these two neural signals may be generated by independent  
18 mechanisms; (ii) MCN output regulates the temporal accuracy of vPAG encoding of fear conditioned  
19 stimulus offset but not onset during retrieval (early extinction) of the conditioned response; (iii) MCN  
20 output also regulates multiple aspects of survival behaviour at different times during fear  
21 conditioning: during acquisition the emission of USVs and the suppression of rearing and also the rate  
22 of extinction of conditioned freezing during retrieval. In summary, the present study provides  
23 evidence that the cerebellum regulates the ability of the PAG to encode a fear memory trace with  
24 temporal precision and also regulates the time of occurrence of appropriate patterns of behaviour  
25 during fear acquisition and retrieval.

26

27

## 28 Results

### 29 *vPAG unit responses during an auditory cued fear conditioning paradigm*

30 As a first step, an auditory cued fear conditioning paradigm (Fig. 1A) was used to investigate how single  
31 unit activity in the vPAG (n=11 animals) responded to fear acquisition and subsequent retrieval and  
32 extinction of fear conditioned responses (Fig. 1B-E). In seven of these animals a dual microdrive  
33 included tetrodes that were also implanted in the contralateral MCN to record local field potential

1 activity. The remaining four animals had a single microdrive for vPAG recording combined with  
2 bilateral cannulae implanted to target MCN. In all animals the position of tetrodes (and where  
3 appropriate cannulae) was histologically verified. The majority of PAG tetrode recording sites were  
4 located in the vPAG, and cannulae or tetrodes implanted in the cerebellum were located close to or  
5 within MCN (Supplementary Fig. 1A, B and C). Since similar electrophysiological data were recorded  
6 from the PAG obtained from animals with a dual microdrive (PAG and MCN) and those with a single  
7 microdrive (PAG, that received a saline infusion into MCN), the results have been pooled in the analysis  
8 below (termed 'control', Figs 2 and 3). There was no significant difference between baseline firing  
9 rates across habituation, acquisition, and extinction training (Supplementary Fig. 2,  $p=0.649$ , one-way  
10 ANOVA). Thus, it seems reasonable to assume that single unit recording was stable over time and  
11 comparable between groups.

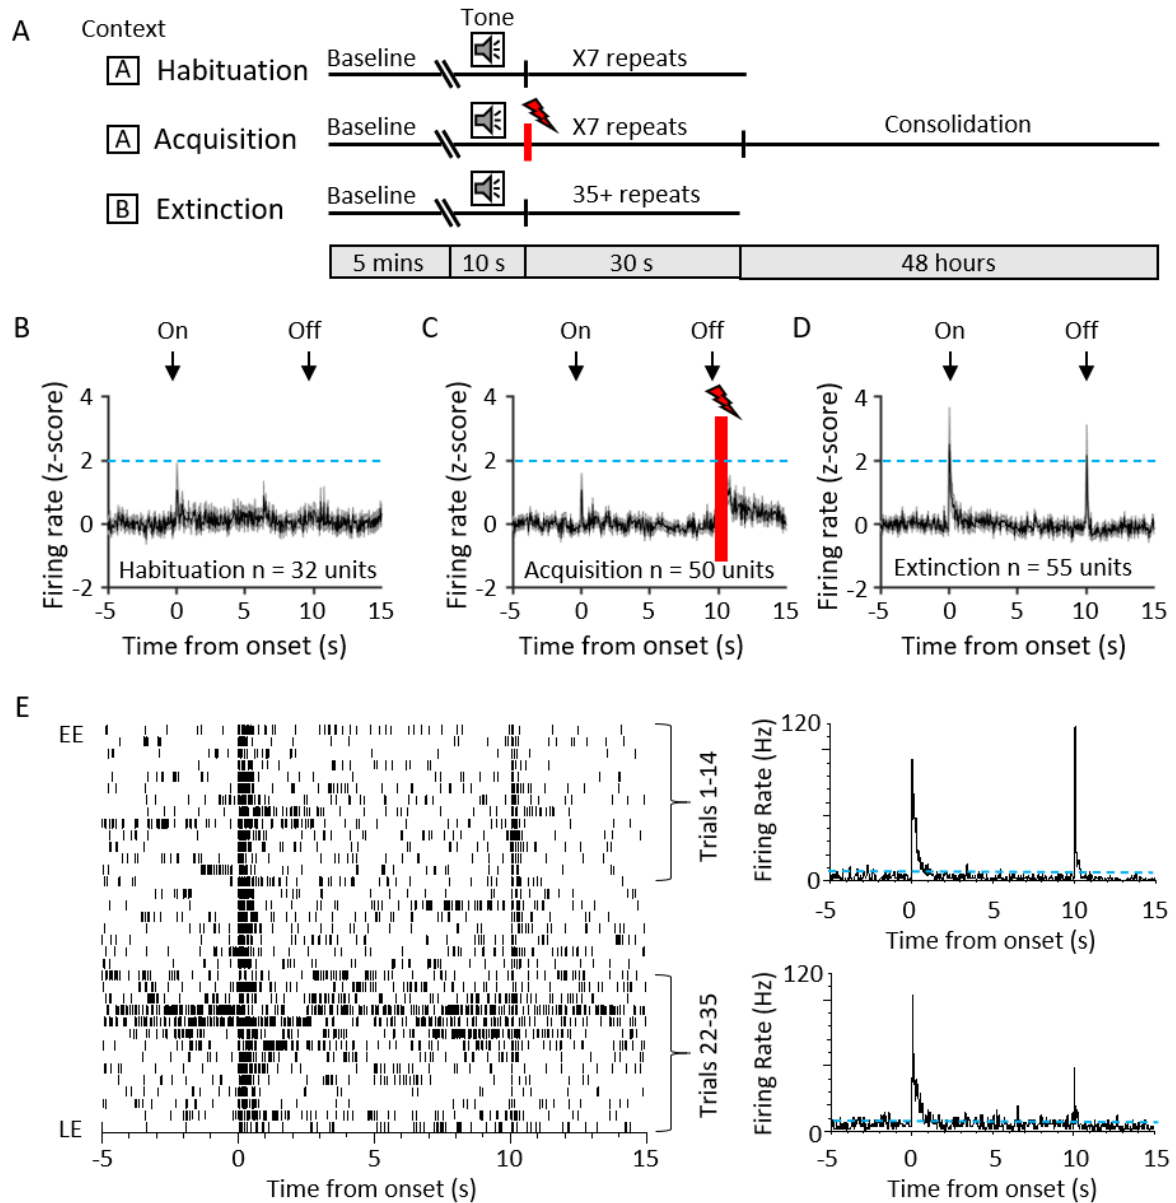

1  
 2 **Figure 1. Single unit vPAG responses during auditory cued fear delay conditioning.** A) Schematic representation  
 3 of the fear conditioning paradigm composed of habituation, acquisition and extinction sessions. Habituation and  
 4 acquisition were carried out in context A, whilst extinction training was in context B. During acquisition, a CS  
 5 tone was paired with a US footshock (see Methods for details). In cannula implanted animals, muscimol or saline  
 6 was injected into the MCN following acquisition during the consolidation phase before retrieval of the CS+ during  
 7 extinction training. B) Peri event time histogram (PETH) showing average firing rate of all available single units  
 8 (n=32) recorded during presentation of the unconditioned tone (10 s) during habituation in control animals. C)  
 9 Same as B but all available single units (n= 50) recorded during acquisition (shaded red and lightning symbol  
 10 indicate time of US footshock). D) Same as B but all available single units (n=55) recorded during presentation  
 11 of the unreinforced CS+ during extinction. For B-D, individual unit activity was z-score normalised to a 5 second  
 12 baseline before tone onset. PETHs show mean  $\pm$ SEM; 40ms bins. E) Example type 1 onset and offset single unit  
 13 recorded during extinction training. Data displayed as raster plot from early extinction (EE) to late extinction (LE)  
 14 with corresponding PETH for EE (trials 1-14) and LE (trials 22-35) (right; 40 ms bins, time zero onset of CS+. The  
 15 dotted blue horizontal line represents significance level ( $p < 0.05$ ).

1 A total of 32 vPAG units were recorded during habituation (Fig. 1 B). The large majority (75%, n=24/32)  
2 were unresponsive to the unconditioned auditory tone; the remainder responded (see Methods for  
3 definition) to tone onset (either increasing, n=6/32 units or decreasing firing rate, n= 2/32 units); and  
4 in some of these cases (15.6%) also to tone offset (either increasing 3/32 units or decreasing firing  
5 rate 2/32).

6 We recorded the activity of 50 vPAG units during acquisition where the CS tone was paired with the  
7 US footshock at tone offset (Fig. 1C). A small proportion of units (18.5%) responded to CS onset.  
8 Following the US, some units (20%) also displayed an increase in firing rate which presumably reflects  
9 sensory afferent drive to the PAG as a result of the aversive peripheral stimulus (e.g. (Sanders et al.,  
10 1980; Heinricher et al., 1987; Sharma et al., 1999).

11 During retrieval and extinction of the conditioned response we recorded a total sample of 55 vPAG  
12 units in control animals. In retrieval during early extinction (EE) 29 units (52.7%) displayed a transient  
13 increase in activity during presentation of the unreinforced conditioned stimulus (CS+, Fig. 1D, E). In  
14 keeping with a previous classification of PAG unit activity during extinction training (Watson et al.,  
15 2016) these units are therefore defined as type 1. The pattern of response was typically a phasic  
16 increase in activity at CS+ onset but an additional feature not previously reported for vPAG units was  
17 also a phasic increase in activity at CS+ offset (Fig. 1D, E). A total of 21/29 (72.4%) type 1 units  
18 responded to both CS+ onset and CS+ offset, but a small proportion only responded to CS+ onset  
19 (10.3%, n=3/29) or only to CS+ offset (17.3%, n=5/29). This raises the possibility that CS+ onset and  
20 offset responses may be partly independent of one another. We have therefore termed them type 1  
21 onset and type 1 offset responses, respectively.

22 Of the remainder of the sample of vPAG units recorded in control animals during EE, 22 (40%)  
23 demonstrated no significant change in firing rate and were therefore classed as type 2 (Watson et al.,  
24 2016). Four units (7%) responded to CS+ onset with a decrease in firing rate (2 of these units also  
25 reduced their firing rate at CS+ offset) and therefore were classed as type 4. No type 3 units (biphasic  
26 response) were observed.

27 Since the large majority of responsive vPAG units recorded in control experiments were type 1 the  
28 following analysis is confined to consideration of their activity during fear conditioned retrieval and  
29 extinction. The majority of type 1 onset units (75%, 18/24 units) and type 1 offset units (73%, 19/26  
30 units) showed significant decreases in responsiveness during extinction training, as measured by the  
31 integrated area of response during CS+ trials in EE versus late extinction (LE, Fig. 2A,C control, type 1  
32 onset units:  $p < 0.0001$ , paired t test; type 1 offset units, Fig 3A,C,  $p = 0.0003$ , paired t test). For type  
33 1 onset responses this reduction was not evident for mean peak z-score (Fig. 2D, decrease of 13.8%

1 from EE to LE; paired t test;  $p=0.197$ ) but was evident for type 1 offset responses (Fig. 3D, decrease of  
2 67.0% from EE to LE; paired t test;  $p = 0.011$ ). This distinction between onset and offset responses  
3 provides additional evidence to suggest they may be evoked by separate mechanisms.

4

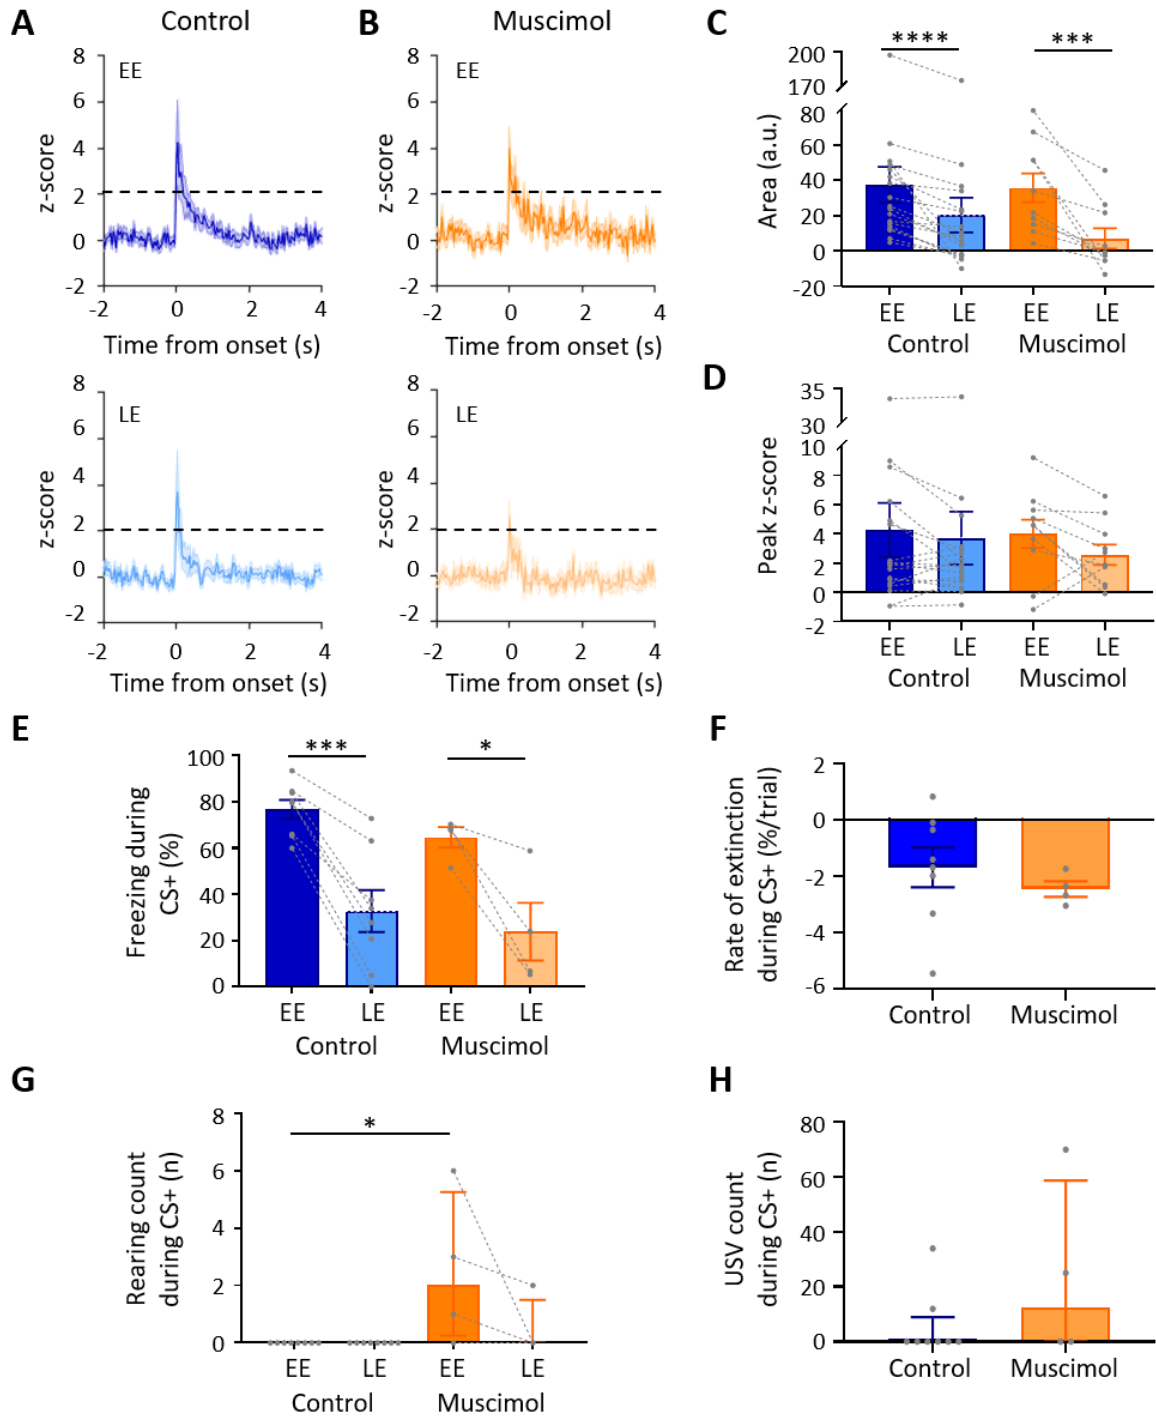

1  
2 **Figure 2. Effect of MCN inactivation during consolidation on vPAG type 1 onset responses and fear behaviours**  
3 **during extinction.** A) Group data for control animals showing average z-scored type 1 onset responses (n=18  
4 units) during early extinction (EE, upper panel) and late extinction (LE, lower panel); solid lines in each plot show  
5 mean z-score, shaded regions  $\pm$ SEM; horizontal dashed lines show +2SD from baseline. B) Same as A but grouped  
6 data for muscimol animals (n=10 single units). C) Bar charts showing average type 1 onset response area  
7 (arbitrary units) during EE and LE for single units recorded in control versus muscimol animals. Individual data  
8 points connected with dashed lines show change in mean response area for each single unit over extinction  
9 training. Bars show group means  $\pm$  SEM. \*\*\*\* p<0.0001, \*\*\* p<0.001. D) Same as C but grouped data for peak  
10 z-score. E) The percentage of total time the CS+ was presented that animals displayed freezing behaviour during  
11 EE or LE in control (n=8 rats) versus muscimol (n=4 rats) experiments. Individual data points connected with



1 dashed lines show change in mean freezing time per animal over extinction training. Bars show group means  $\pm$   
2 SEM. \*\*\*  $p < 0.001$ , \*  $p < 0.05$ . F Rate of extinction as measured by the change in freezing percentage during  
3 presentation of the CS+ over the first 21 CS+ presentations during extinction training in control (n=8 rats) versus  
4 muscimol (n=4 rats) experiments. Individual data points show mean rate of change per animal. Bars show group  
5 means  $\pm$ SEM. G) The total number of rears during presentation of the CS+ in extinction training in control (n=8  
6 rats) versus muscimol (n=4 rats) experiments. Individual data points connected with dashed lines show change  
7 in mean number of rears per animal over extinction training. Bars show group median and IQR. (Mann Whitney  
8 test, \*  $p < 0.05$ ). H) Total number of ultrasonic vocalisations (USVs) during presentation of the CS+ in extinction  
9 training in control (n=8 rats) versus muscimol (n=4 rats) experiments. Individual data points show mean count  
10 per animal. Bars show group median and IQR.

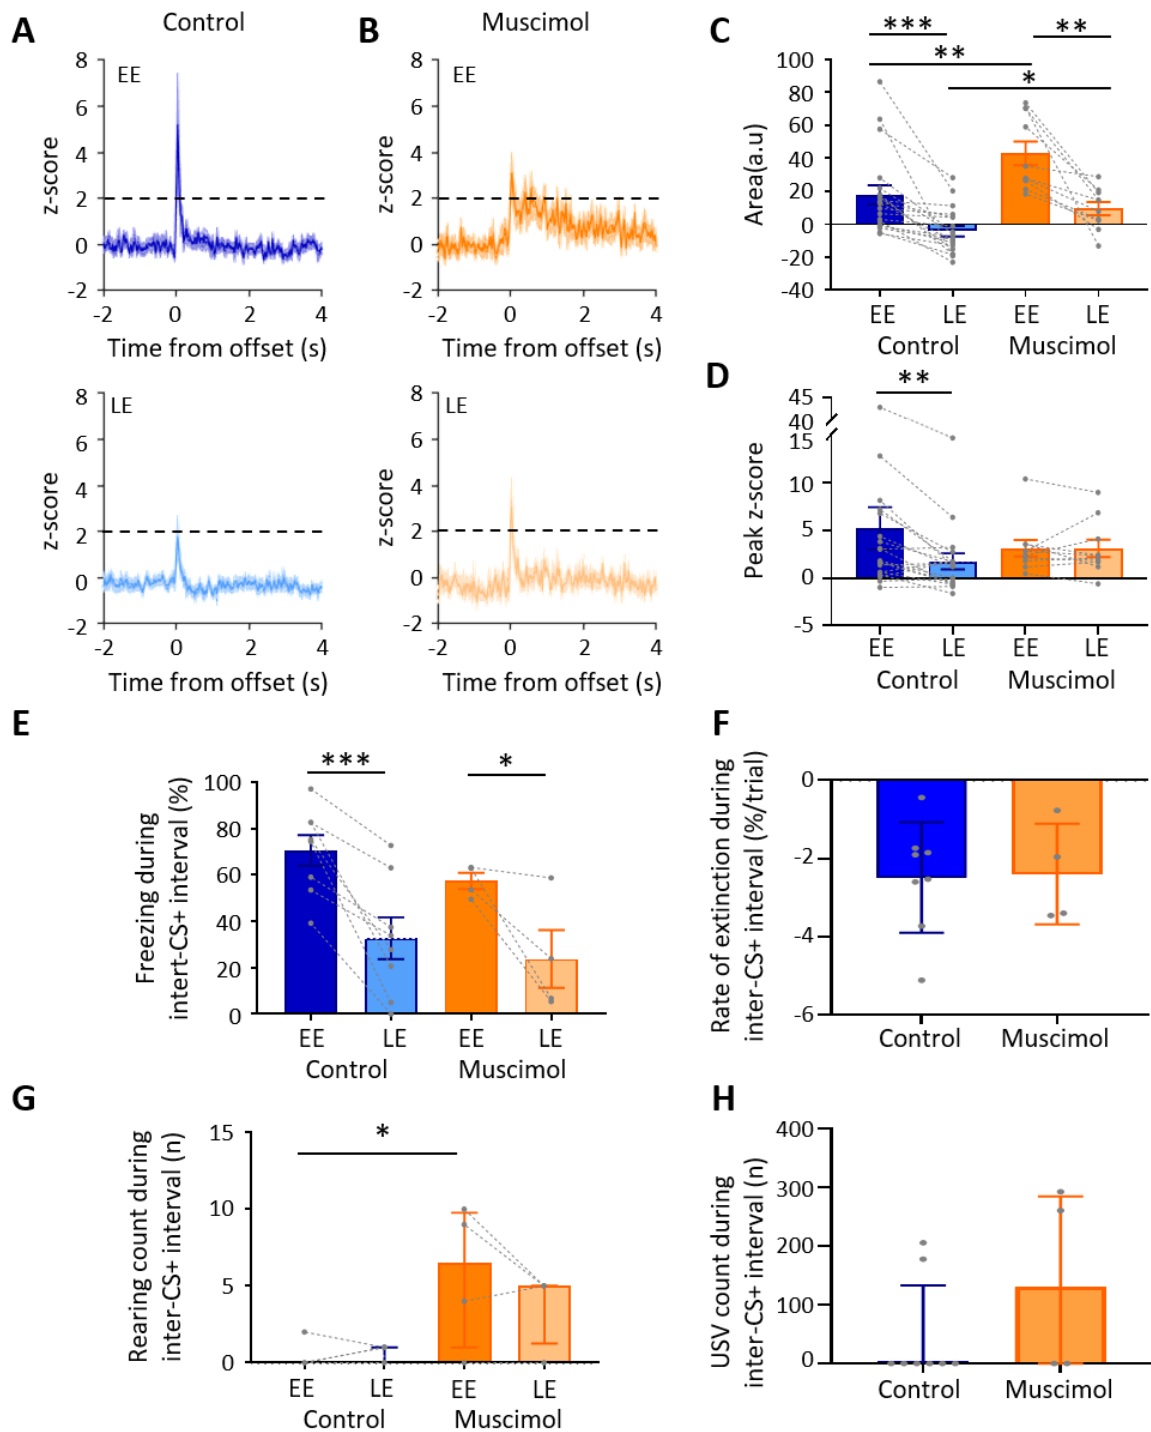

1  
2 **Figure 3. Effect of MCN inactivation during consolidation on vPAG type 1 offset responses and fear behaviours**  
3 **during extinction.** A) Group data for control animals showing average z-scored type 1 offset responses (n=19  
4 single units) during early extinction (EE, upper panel) and late extinction (LE, lower panel); solid lines in each plot  
5 show mean z-score, shaded regions  $\pm$ SEM; horizontal dashed lines show +2SD from baseline. B) Same as A but  
6 grouped data for muscimol animals (n=10 single units). C) Bar charts showing average type 1 offset response  
7 area (arbitrary units) during EE and LE for single units recorded in control versus muscimol animals. Individual  
8 data points connected with dashed lines show change in mean response area for each single unit over extinction  
9 training. Bars show group means  $\pm$  SEM. Paired t test, \*\*\*  $p < 0.001$ , \*\*  $p < 0.01$ ; Unpaired t test, \*\*  $p < 0.01$ ,  
10 \*  $p < 0.05$ . D) Same as C but grouped data for peak z-score. Paired t test, \*\*  $p < 0.01$ . E) The percentage of total  
11 time during the inter-CS+ interval that animals displayed freezing behaviour during EE or LE in control (n=8 rats)

1 versus muscimol (n=4 rats) experiments. Individual data points connected with dashed lines show change in  
2 mean freezing time per animal over extinction training. Bars show group means  $\pm$  SEM. Paired t test, \*\*\*  
3  $p < 0.001$ , \*  $p < 0.05$ . F) Rate of extinction as measured by the change in freezing percentage during the inter-CS+  
4 interval for the first 21 CS+ presentations during extinction training in control (n=8 rats) versus muscimol (n=4  
5 rats) experiments. Individual data points show mean rate of change per animal. Bars show group means  $\pm$ SEM.  
6 G) The total number of rears in extinction training during the inter-CS+ interval in control (n=8 rats) versus  
7 muscimol (n=4 rats) experiments. Individual data points connected with dashed lines show change in mean  
8 number of rears per animal over extinction training. Bars show group median and IQR (Mann Whitney test,  
9 \* $p < 0.05$ ). H) Total number of ultrasonic vocalisations (USVs) during extinction training in the inter-CS+ interval  
10 for control (n=8 rats) versus muscimol (n=4 rats) experiments. Individual data points show mean count per  
11 animal. Bars show group median and IQR.

12

### 13 *vPAG offset responses during trace conditioning.*

14 For the results described above a delay classical conditioning paradigm was used during acquisition in  
15 which the unconditioned stimulus (US) was timed to occur at CS offset (Fig. 1A, see Methods). During  
16 EE (retrieval) an increase in unit activity at CS+ offset may therefore signal the end of the conditioned  
17 tone and/or timing of the expected US. To examine this, in one animal, a 1 second trace delay was  
18 introduced between the CS and US during acquisition trials. Four vPAG units were recorded during  
19 extinction training and all responded at CS+ offset and did not respond at the time when the US would  
20 have been expected to occur 1 sec later (Supplementary Fig. 3). Although caution is clearly needed  
21 when interpreting a small sample, our results are consistent with vPAG activity at CS+ offset signalling  
22 the end of the conditioned stimulus rather than the time of the expected occurrence of the  
23 unconditioned stimulus.

### 24 *The effect of temporary MCN inactivation during fear consolidation on vPAG activity*

25 In 4 additional animals, muscimol was infused into the MCN to reversibly block cerebellar output  
26 during consolidation of the fear associative memory prior to extinction training (termed 'muscimol' in  
27 extinction sessions, Figs 2 and 3). Effects of the muscimol infusion on general motor co-ordination  
28 were carefully monitored. Immediately after the infusion all animals (n=4) displayed ataxia, providing  
29 a positive control that the muscimol was disrupting cerebellar activity. The severity of the ataxia  
30 gradually reduced over several hours and the animals were behaviourally normal after 24hrs. After a  
31 total delay of 48hrs, to ensure complete washout of the drug, the animals were exposed to the  
32 unreinforced CS+ in extinction training. There was no significant difference between baseline firing  
33 rates across habituation, acquisition, and extinction training (Supplementary Fig. 2,  $p = 0.079$ , one-way  
34 ANOVA). A total of 14 type 1 vPAG units were recorded during extinction. Similar to the control results  
35 described above, the majority (71%, 10/14 units) of type 1 onset units (Fig. 2B) showed a reduction in  
36 responsiveness during extinction training as measured by mean change in integrated area of response

1 (Fig. 2C, on average the integrated area of response was 77.8 % smaller between EE and LE,  $p = 0.002$ ,  
2 paired t test). In keeping with the findings from control animals, no significant difference was found  
3 for mean peak z-score (Fig. 2D, peak 0.7% smaller between EE and LE,  $p = 0.971$ , paired t test). There  
4 was also no statistically significant difference between control and muscimol animals for CS+ onset  
5 responses in EE or LE for either measure of response (Fig. 2C and D, mean integrated area in EE,  $p =$   
6  $0.689$ , unpaired t test; mean integrated area in LE,  $p = 0.351$ , unpaired t test; mean peak z-score in EE,  
7  $p = 0.919$ , unpaired t test; mean peak z-score in LE,  $p = 0.654$ , unpaired t test,).

8 By marked contrast, inspection of Figure 3A,B shows that by comparison to controls ( $n=23$  units), there  
9 was a clear difference during EE in the pattern of response of vPAG units to CS+ offset in muscimol  
10 experiments ( $n=10$  units). On average, the integrated area of response in muscimol experiments  
11 increased by 58.5% by comparison to control (Fig. 3C,  $p = 0.002$ , unpaired t test). Inspection of Figure  
12 3A,B shows there was also a reduction in mean peak z-score (muscimol mean peak was 60% of control)  
13 but this was not statistically significant (Fig. 3D,  $p = 0.515$ , unpaired t test). In LE, the integrated area  
14 of response was also significantly different. On average, muscimol experiments had a significantly  
15 increased area of response (41.6% larger) than control animals (Fig 3C,  $p = 0.014$ , unpaired t test).  
16 Similar to EE, the mean peak z-score in LE was also not significantly different between muscimol and  
17 control experiments (Fig 3D,  $p = 0.32$ , unpaired t test). Taken all together these data therefore suggest  
18 that during extinction training the temporally precise pattern of response of vPAG units at CS+ onset  
19 is mainly unaffected by disruption of MCN during consolidation, but the activity at CS+ offset is  
20 disrupted during EE, providing additional evidence that the two responses are independent of one  
21 another.

## 22 *The effect of temporary MCN inactivation during fear consolidation on behaviour*

### 23 (i) *Effects during presentation of the CS+ in extinction training*

24 To investigate whether the muscimol infusion into MCN during consolidation had an effect on  
25 subsequent expression of fear-conditioned behaviour, several defence-related responses were  
26 measured during presentation of the unreinforced CS+: freezing (% during extinction and extinction  
27 rate), rearing activity and number of fear-related ultrasonic vocalisations (USVs). Both control and  
28 muscimol animals showed extinction of the conditioned freezing response between EE vs LE (Fig. 2E.  
29 Control, EE freezing=  $76.7 \pm 4.1$  % vs LE freezing =  $32.6 \pm 9.04$  %,  $p = 0.0002$ ; Muscimol, EE freezing=  
30  $64.6 \pm 4.4$  % vs LE freezing =  $23.7 \pm 12.4$  %,  $p = 0.035$ , paired t tests). No significant differences were  
31 detected between control and muscimol animals in the percentage of time freezing during EE or LE  
32 (Fig. 2E. EE,  $p = 0.098$ ; LE,  $p = 0.579$ , unpaired t test), nor was there a difference detected in rate of  
33 extinction of freezing (Fig. 2F. Control,  $-1.7 \pm 2.0$ ; Muscimol,  $-2.5 \pm 0.6$ ;  $p = 0.473$ , unpaired t test).

1 However, muscimol animals (n=4) displayed a significant increase in rearing activity during EE  
2 compared to controls (Fig. 2G, n=8 animals, median 2.0 rears during CS+ by comparison to control of  
3 0 rears,  $p = 0.018$ , Mann Whitney test). This difference was not evident in LE ( $p = 0.333$ , Mann Whitney  
4 test). In muscimol animals, rearing activity reduced in LE, but this was not significantly different from  
5 EE ( $p = 0.250$ , Wilcoxon test).

6 In terms of ultrasonic vocalisations (USVs) 2/8 (25%) of control animals and 2/4 (50%) of muscimol  
7 animals emitted USVs during presentation of the CS+. In terms of the mean total number of USVs per  
8 animal in control versus muscimol groups across all extinction training there was no significant  
9 difference (Fig. 2H,  $p = 0.321$ , Mann Whitney test).

10 In summary, for the various behavioural measures studied there was no detectable difference  
11 between control and muscimol animals during extinction training with the exception of rearing, where  
12 in EE (retrieval), MCN inactivation resulted in a significant increase during presentation of the CS+.

#### 13 (ii) *Effects after presentation of the CS+ in extinction training*

14 To investigate whether MCN inactivation during consolidation has effects on fear behaviour after CS+  
15 offset, the same behavioural measures studied during delivery of the CS+ were quantified during the  
16 inter-CS+ interval. In terms of freezing behaviour during the inter-CS+ interval, both control and  
17 muscimol animals showed extinction learning similar to that found during presentation of the CS+ (Fig  
18 3E, EE vs LE: control,  $p = 0.0003$ , muscimol,  $p = 0.014$ , paired t tests). There were no significant  
19 differences in muscimol animals by comparison to controls for either EE or LE (Fig. 3E, EE,  $p = 0.21$ , LE,  
20  $p = 0.929$ , unpaired t tests). Nor was there a significant difference in the rate of extinction between  
21 groups (Fig. 3F,  $p = 0.918$ , unpaired t test).

22 In terms of rearing behaviour, during EE muscimol animals displayed significantly more rearing activity  
23 during the inter-CS+ interval than control animals (Fig. 3G, median 6.5 rears versus 0 rears during EE,  
24  $p = 0.024$ , Mann Whitney test). During LE, although muscimol animals displayed higher numbers of  
25 rears (median 5 compared with control animals 0 rears), this difference was not statistically significant  
26 (Fig. 3G,  $p = 0.067$ , Mann Whitney test).

27 The mean total number of USVs across all extinction blocks per animal in muscimol groups was  
28 increased during the inter-CS+ interval but this was not significantly different from control (Fig. 3H,  $p$   
29  $= 0.26$ , Mann Whitney test). Therefore, based on the available data no systematic differences were  
30 detected in the inter CS+ interval between control and muscimol groups in terms of extinction learning  
31 or numbers of USVs but a significant difference was detected in terms of an increase in rearing  
32 behaviour during EE (retrieval).

1 *Population activity in the MCN and vPAG*

2 To assess changes in neural population activity during extinction, auditory event related potentials  
3 (ERPs) were recorded simultaneously from the MCN and vPAG (n= 5 animals, Fig. 4). The ERP in the  
4 vPAG at CS+ onset had a significantly shorter onset latency than the ERP recorded in the same animals  
5 in MCN (vPAG onset  $6.0 \text{ ms} \pm 1.14 \text{ SEM}$ ; MCN onset  $25.3 \text{ ms} \pm 2.43 \text{ SEM}$ ,  $p=0.006$ , paired t-test).  
6 However, latency to peak was not significantly different (PAG peak  $65.4 \text{ ms} \pm 1.4 \text{ SEM}$ ; MCN peak  $74.5$   
7  $\text{ms} \pm 6.6 \text{ SEM}$ ,  $p=0.294$ , paired t-test). At CS+ offset the ERP in the vPAG was also significantly shorter  
8 than the ERP in MCN (vPAG offset  $28.6 \pm 6.3 \text{ SEM}$ ; MCN offset  $47.6 \text{ ms} \pm 2.7 \text{ SEM}$ ,  $p=0.037$ ; paired t-  
9 test), while latency to peak was similar (vPAG peak  $89.6 \pm 5.7 \text{ SEM}$ ; MCN peak  $99.0 \text{ ms} \pm 6.5 \text{ SEM}$ ,  
10  $p=0.310$ , paired t-test). The difference in onset latency between ERP onset and offset responses  
11 recorded within both vPAG and MCN was statistically significant (vPAG onset vs offset,  $p=0.024$ , Welch  
12 unpaired t test; MCN onset vs offset,  $p=0.0003$ , unpaired t test). This difference suggests that ERP  
13 onset and offset responses are likely to be generated by different neural pathways.

14

15 At CS+ onset, the peak-to-peak amplitude of the ERPs recorded in the MCN and vPAG did not show a  
16 statistically significant difference during extinction training (Fig. 4A, MCN: EE ERP =  $527.1 \pm 169 \text{ mV}$  vs  
17 LE ERP =  $356 \pm 130.5 \text{ mV}$ ,  $p=0.09$ , paired t-test; Fig 4C, vPAG: EE ERP =  $539.2 \pm 119.4 \text{ mV}$  vs LE ERP =  
18  $467 \pm 83.7 \text{ mV}$ ,  $p=0.466$ ; paired t-test). By comparison, ERPs recorded at CS+ offset in both the MCN  
19 (Fig. 4B) and vPAG (Fig. 4D) showed a significant decrease in amplitude during extinction training in  
20 EE versus LE (MCN 23.7% reduction in ERP size, EE =  $575.7 \pm 206.9$  vs LE =  $439.1 \pm 165.8$ ,  $p=0.038$ ; vPAG  
21 37.2% reduction in ERP size, EE =  $580.4 \pm 133.8$  vs LE =  $364.7 \pm 113.2$ ,  $p=0.002$ , paired t-test). Taken  
22 together these ERP data therefore suggest that population activity in MCN and vPAG parallel the  
23 changes that occur in vPAG single unit peak activity at onset and offset of the CS+ during extinction of  
24 a fear conditioned response.

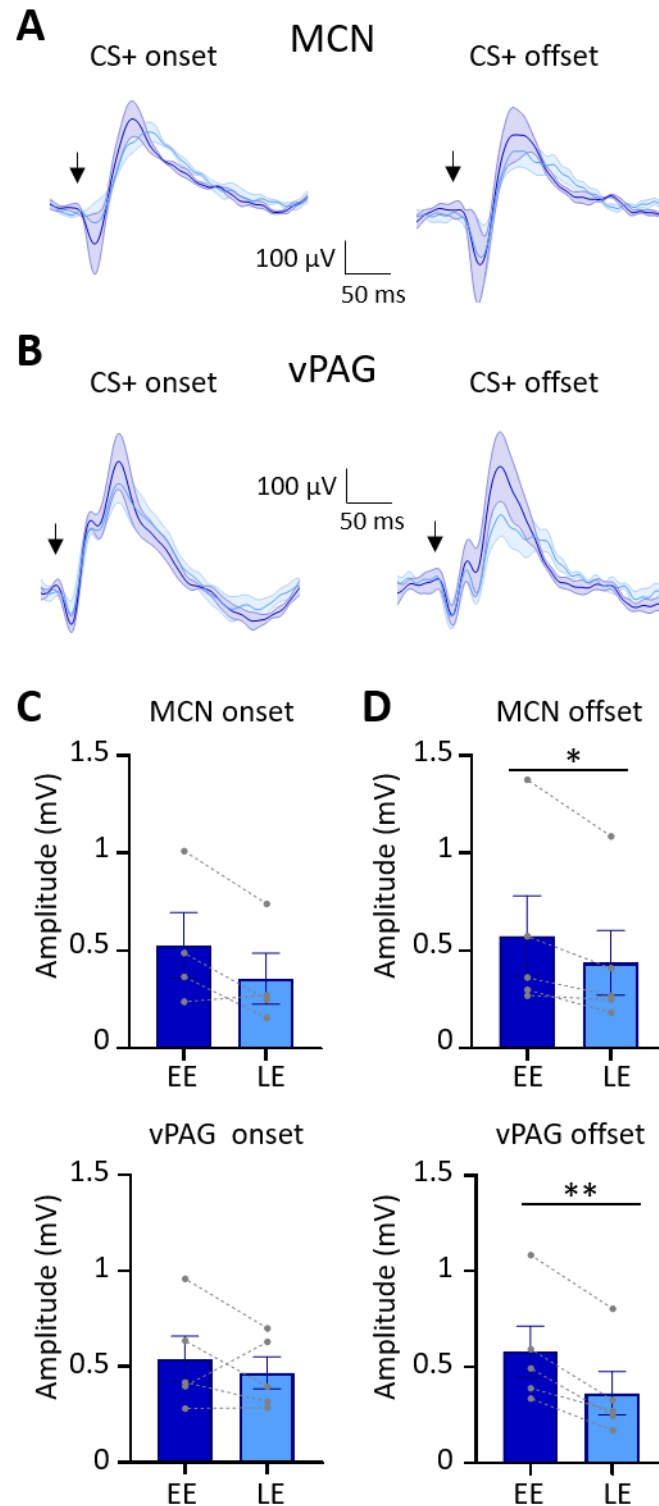

1

2 **Figure 4. Auditory event related field potentials (ERPs) recorded simultaneously in the MCN and vPAG during**  
3 **extinction.** A) Group average ERPs recorded in the MCN in control animals at CS+ onset (n=4 rats) (left hand  
4 panel) and CS+ offset (n=5 rats) (right hand panel); arrows indicate time of CS+ onset or offset; each waveform  
5 shows mean  $\pm$  SEM; dark blue, average ERP during EE, light blue, average ERP during LE. B) Same as A but ERPs  
6 recorded simultaneously from the vPAG (n=5 rats). C) Plots showing mean peak to peak amplitude of ERPs  
7 recorded at CS+ onset in EE versus LE; upper panel MCN, lower panel vPAG (n=4 and n=5 rats respectively, means  
8  $\pm$  SEM). Individual data points connected with dashed lines show change in mean amplitude over extinction  
9 training. D) Same as C but for CS+ offset (n= 5 rats, Paired t-test, \*p<0.05, \*\* p<0.01).

1

2 *Inhibition of direct MCN to vPAG projection during fear acquisition and early consolidation*

3 Given that during extinction training: (i) population activity in MCN resembles changes in vPAG  
4 population and unit activity; and (ii) the finding that global inactivation of MCN in rats can disrupt  
5 encoding in vPAG, it was of interest to determine the extent to which a direct projection exists  
6 between the MCN and vPAG. In 7 rats a fluorescently tagged anterograde virus was injected into the  
7 MCN (Supplementary Fig. 4). In every case terminal projections in the PAG were primarily localised to  
8 its ventrolateral region on the contralateral side.

9 To investigate the function of this direct MCN-PAG projection, viral vector encoding the inhibitory  
10 DREADD hM4D (n = 10, AAV-hSyn-hM4D(Gi)-mCherry, termed DREADD, see Methods) or control  
11 (pAAV-hSyn-EGFP, n = 9) was injected bilaterally into the MCN. Terminal projections containing the  
12 virus were targeted in the vPAG by stereotaxic delivery of CNO (for histology see supplementary Fig  
13 5A).

14 To determine the effect of MCN-PAG pathway inactivation on conditioned fear behaviours, CNO was  
15 infused 15 minutes before acquisition training to inhibit MCN-PAG projections during acquisition and  
16 early consolidation. During acquisition there was no significant difference in the percentage of  
17 freezing between control versus DREADD animals during CS-US paired presentations (Fig. 5A upper  
18 panel, two-way repeated measures ANOVA; Time,  $F(4.45, 75.64) = 16.63$ ,  $p < 0.0001$ ; Virus,  $F(1, 17) =$   
19  $0.0889$ ,  $p = 0.769$ ) nor during the inter-CS-US interval (Fig. 5A lower panel, two-way repeated  
20 measures ANOVA; Time,  $F(3.834, 65.19) = 17.82$ ,  $p < 0.0001$ ; Virus,  $F(1, 17) = 2.339$ ,  $p = 0.144$ ).  
21 However, comparison of the mean total number of USVs per animal in DREADD versus control groups  
22 across all acquisition trials showed that during the inter CS-US interval, there was a significant  
23 reduction in USVs (Fig. 5B lower panel, a decrease of 36%,  $p=0.032$ , Mann Whitney test). This  
24 difference was not apparent during CS-US presentations (Fig. 5B upper panel,  $p=0.310$ , Mann Whitney  
25 test).



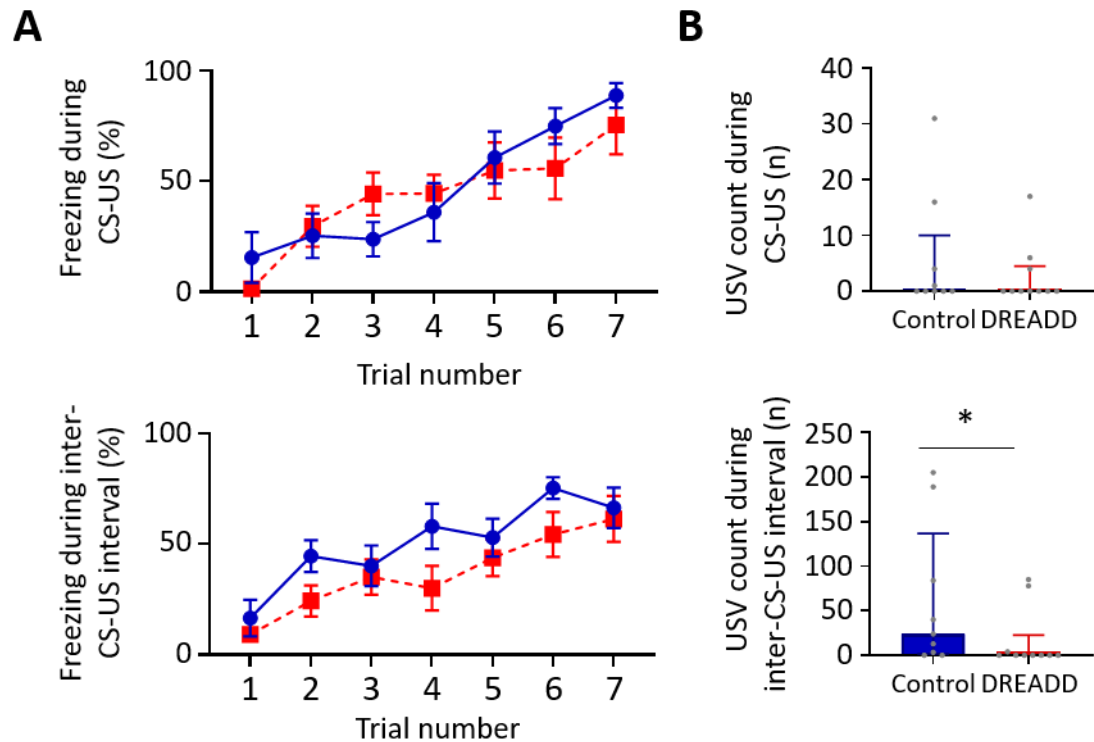

1

2 **Figure 5. MCN-vPAG pathway inhibition and effect on behaviour during acquisition.** A) The effect of CNO  
3 delivery into the vPAG on freezing behaviour measured during either presentation of the paired CS-US (upper  
4 plot), or the inter-CS-US interval (lower plot) during acquisition. Blue plot, control animals (n= 9 rats); red plot  
5 DREADD (hM4D(Gi)) animals, n= 10 rats); data points mean  $\pm$  SEM. B) The number of USVs recorded in control  
6 versus DREADD animals during CS-US presentation (upper panel) and during the inter-CS-US interval (lower  
7 panel); Bars show median  $\pm$  IQR. Mann Whitney, one tailed test, \* p< 0.05.

8

9 During extinction training, control and DREADD animals showed similar levels of freezing during  
10 presentation of the unreinforced CS+ (Fig. 6A, EE p=0.645, LE p=0.362, unpaired t test,) and the inter-  
11 CS+ interval (Fig. 6B, EE p=0.501, LE p=0.422, unpaired t-test). Both groups also showed similar levels  
12 of extinction learning during CS+ (control, p =0.0103; DREADD, p <0.0001, paired t test) and the inter-  
13 CS+ interval (control, p = 0.0042; DREADD, p <0.0001, paired t tests). However, the rate of extinction  
14 during the CS+ was significantly slower in DREADD animals (Fig. 6C, p=0.042, unpaired t test), but not  
15 during the inter-CS+ interval (Fig. 6D, p=0.229, unpaired t test). The latter finding suggests the effect  
16 is not a general disruption of the expression of freezing behaviour.

17 With regard to rearing behaviour no differences were found between control and DREADD animals  
18 both within early and late extinction (Fig. 6E,F rearing; EE CS+, p=0.305; LE inter-CS+ interval, p=0.903;  
19 LE CS+, p=0.273; LE inter-CS+, p=0.786, unpaired t test), and across all extinction training (Fig. 6E,F EE  
20 vs LE; control CS+, p=0.556, control inter-CS+, p=0.269; DREADD, CS+ p = 0.244 ; DREADD, inter-CS+,  
21 p = 0.111, paired t test,). Similarly, there was also no significant difference in the total number of USVs

- 1 per animal in DREADD versus control groups across all extinction training (Fig. 6G,H CS+,  $p=0.844$ ;
- 2 inter-CS+,  $p=0.849$ , Mann Whitney tests).

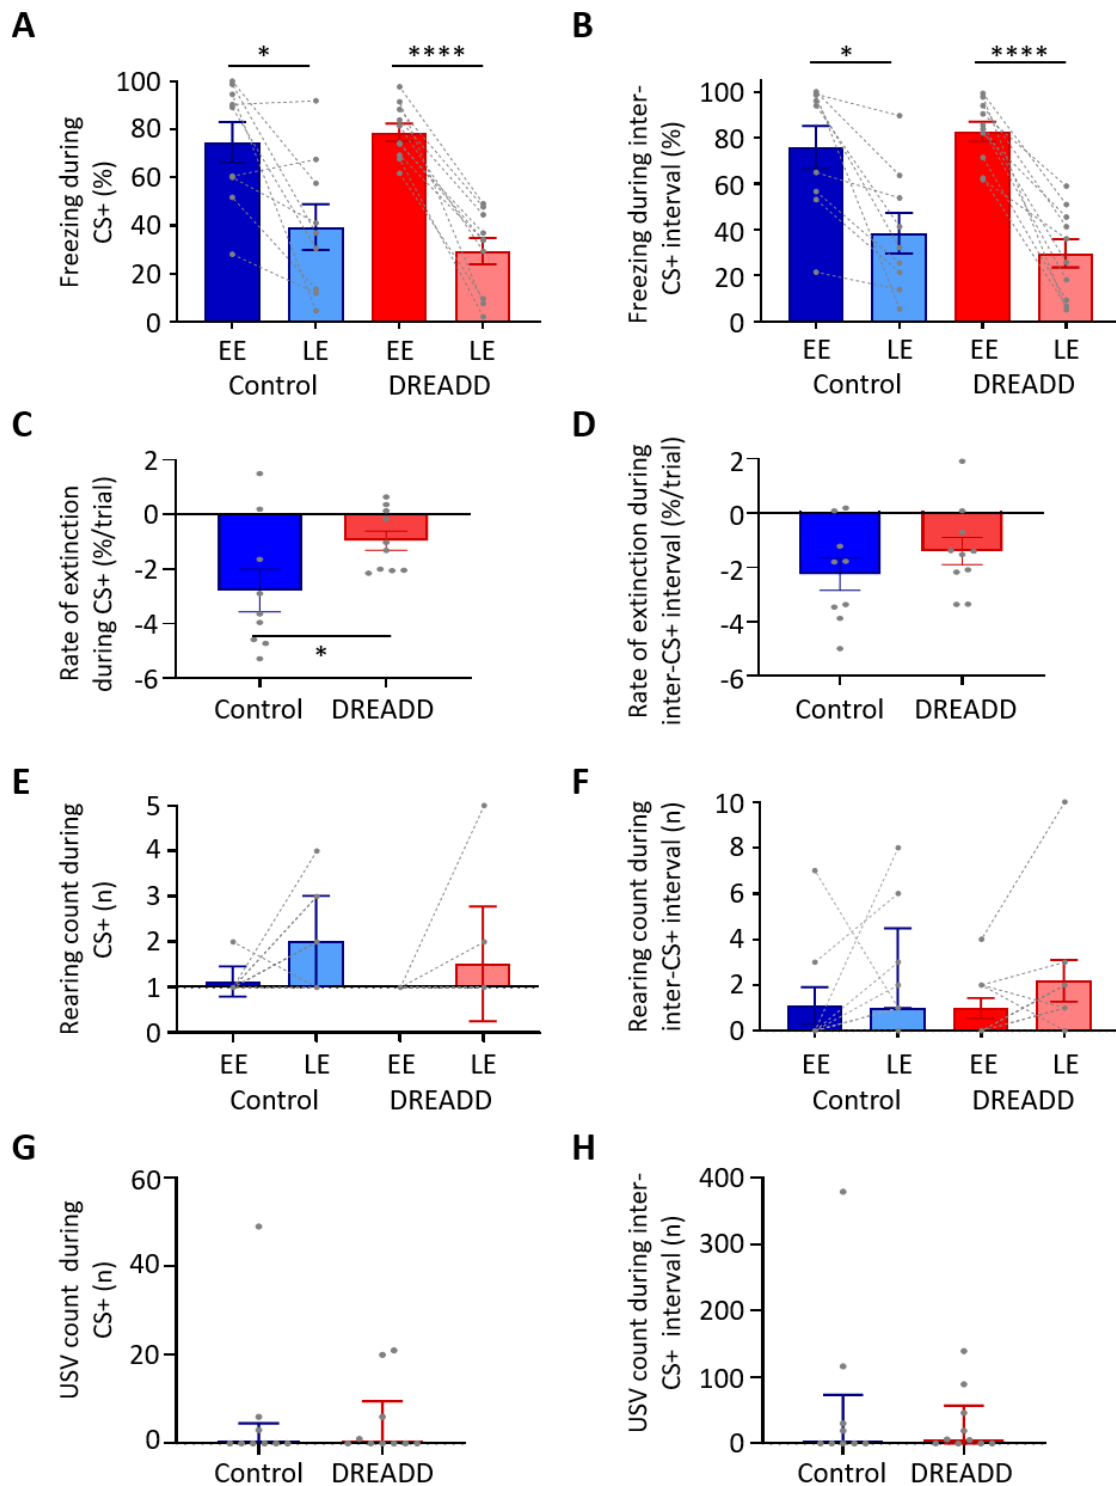

3

- 4 **Figure 6. MCN-vPAG pathway inhibition effect on behaviour during extinction.** A) The percentage of total time
- 5 the CS+ was presented that animals displayed freezing behaviour during EE or LE in control (n=9 rats) versus
- 6 DREADD (hM4D(Gi), n=10 rats). Individual data points connected with dashed lines show change in mean
- 7 freezing time per animal over extinction training. Bars show group means  $\pm$  SEM. \*\*\*\*  $p<0.0001$ , \*  $p<0.05$ . B)

1 Same as A but percentage time freezing during the inter-CS+ interval. C) Rate of extinction as measured by the  
2 change in freezing percentage during presentation of the CS+ over the first 21 CS+ presentations during  
3 extinction training in control (n=9 rats) versus DREADD (n= 10 rats) experiments. Individual data points show  
4 mean rate of change per animal. Bars show group means  $\pm$ SEM. Unpaired t-test \*  $p < 0.05$ . D) Same as C but for  
5 inter-CS+ intervals. E) The total number of rears during presentation of the CS+ in extinction training in control  
6 (n=9 rats) versus DREADD (n=10 rats). Individual data points connected with dashed lines show change in mean  
7 number of rears per animal over extinction training. Bars show group median and IQR. F) Same as E but for inter-  
8 CS+ intervals. G) Total number of ultrasonic vocalisations (USVs) during presentation of the CS+ in extinction  
9 training in control (n=9 rats) versus DREADD (n=10 rats) experiments. Individual data points show mean count  
10 per animal. Bars show group median and IQR. H) Same as G but total number of USVs recorded during inter-CS+  
11 interval.

12

### 13 *Control experiments for MCN-PAG inactivation*

14 To test for potential changes in motor and anxiety behaviour induced by inactivation of the MCN-PAG  
15 pathway, the same DREADD (and control) animals studied in the fear conditioning experiments (n=18  
16 rats) were also tested on the following tasks after CNO infusion: beam walking, open field and elevated  
17 plus maze. By comparison to controls, no change was found in performance on the beam  
18 (Supplementary Fig. 5B, time to traverse,  $p=0.618$ , unpaired t-test; number of foot slips,  $p=0.500$ ,  
19 Mann-Whitney test); nor was there a difference in the distance travelled in an open field arena  
20 (Supplementary Fig. 5C,  $p=0.794$ , unpaired t-test), or the time spent in the centre versus the perimeter  
21 of the open field (Supplementary Fig. 5D, centre  $p=0.887$ ; periphery  $p=0.651$ , unpaired t-test); or time  
22 spent in the open or closed arm of the elevated plus maze (Supplementary Fig. 5E, open arm,  $p=0.635$ ;  
23 closed arm,  $p=0.316$ ; unpaired t-test). Thus, no evidence was obtained to suggest that inactivation of  
24 the MCN-PAG causes a general deficit in motor behaviour or change in anxiety levels. However,  
25 insufficient inhibition of the MCN-PAG pathway cannot be ruled out. In all available animals (controls,  
26 n=8; DREADD, n=9) we therefore made an intraperitoneal injection of CNO in order to test for the  
27 effects of general inhibition of MCN. Consistent with the muscimol experiments, in every DREADD  
28 case this produced ataxia, although this was generally less severe and shorter lasting (~1h) than was  
29 observed in the muscimol animals. For example, immediately after the infusion of muscimol, animals  
30 were unable to perform the beam walking task, while the DREADD animals were able to perform the  
31 task, although deficits were evident by comparison to baseline performance (Supplementary Fig. 5F,  
32 slower time to traverse,  $p=0.006$ , unpaired t-test; increased foot slips,  $p=0.086$ , Mann-Whitney test).

### 33 **Discussion.**

34 We have shown that vPAG neurons (type 1 units) encode temporally precise information about both  
35 the onset and offset of a fear conditioned auditory stimulus and that these two neuronal signals may  
36 be generated by independent mechanisms. This is because in vPAG during retrieval and extinction: i)  
37 some single units only respond to CS+ onset or only to CS+ offset; ii) unit onset and offset responses

1 exhibited different characteristics during extinction training; iii) MCN inactivation disrupted the vPAG  
2 pattern of unit activity at CS+ offset but not onset; and (iv) the latency of the event related potential  
3 (ERP) at CS+ onset was significantly shorter than the ERP recorded at CS+ offset. Together, these  
4 findings imply different neural pathways generate onset and offset responses.

5 Importantly, vPAG units displayed little or no response to an auditory tone during habituation but  
6 displayed robust activity at tone onset and/or offset when the same tone was classically conditioned.  
7 This provides evidence that the responses were related to the associative conditioning rather than the  
8 sensory stimulus. Consistent with a recent study in mice (Frontera et al., 2020) the present results in  
9 rats found that inactivation of the MCN-vPAG pathway during acquisition reduces the subsequent rate  
10 of extinction of conditioned freezing behaviour during retrieval, and that MCN inactivation during  
11 consolidation has no detectable effect on fear conditioned freezing. However, the present behavioural  
12 results advance understanding beyond effects on freezing. Fear state involves a multiple pattern of  
13 defence-related responses, including (but not limited to) USVs and risk assessment behaviour such as  
14 rearing. We show that inactivation of the MCN-vPAG pathway during acquisition significantly  
15 increases the expression of fear-related USVs, and that MCN inactivation during consolidation  
16 significantly increases rearing during subsequent extinction training. Taken all together this raises the  
17 possibility that the MCN regulates different aspects of fear behaviour depending on the stage of  
18 conditioning (acquisition, retrieval, or extinction).

19 In regard to our electrophysiological findings, similar responses to CS+ onset in vPAG have been  
20 reported previously by ourselves (Watson et al., 2016) and others (Ozawa et al., 2017), but to our  
21 knowledge no equivalent response precisely time locked to CS+ offset has been described. This may  
22 be due to differences in the characteristics of the auditory cue used for conditioning (e.g., duration,  
23 intensity and rise-fall time of the tone: Takahashi et al., 2004; Qin et al., 2007; Scholl et al., 2010; Harris  
24 et al., 2017; Sołtyga et al., 2019), but also, because detection of such responses depends on the  
25 temporal resolution used for the analysis. For example, Watson et al. (2016) used, as is the case in  
26 many other electrophysiological studies, a 1 sec bin width to visualize the patterns of vPAG activity  
27 during CS+ presentation. Because offset responses are brief, temporally precise events, we found that  
28 a 40 ms bin width was needed to reliably capture them.

29 Fear conditioned CS+ onset responses in vPAG are thought to be generated as a result of preceding  
30 activity in the amygdala (Tovote et al., 2016;) and may encode multiple aspects of fear processing,  
31 including maintenance of fear memory after extinction (Watson et al., 2016), prediction error coding  
32 (Ozawa et al. 2017), the transmission of aversive teaching signals to the amygdala (Johansen et al.,  
33 2010) and threat probability (Wright and McDannald, 2019). vPAG activity has also been correlated to

1 the onset of freezing behaviour (Tovote et al., 2016; Watson et al., 2016) indicating that there may be  
2 several distinct neuronal populations in the PAG that are responsive to conditioned stimulus onset.  
3 Our results for CS+ onset responses are consistent with Watson et al. (2016), as we show the phasic  
4 increase in neural activity was dependent on associative conditioning, and type 1 onset responses  
5 were generally similar in early and late extinction (ie were extinction resistant) and therefore may  
6 contribute to the persistence of fear memory after extinction.

7 In terms of previous reports of CS+ offset responses in vPAG, Wright and McDannald (2019) identified  
8 a distinct population of units in an auditory fear discrimination task they termed ramping units. These  
9 units were related to threat probability and also to fear output as determined by freezing behaviour.  
10 Ramping units progressively increase activity over the duration of the auditory cue presentation,  
11 reaching a peak around sound offset and ramping down in activity thereafter. However, this pattern  
12 differs markedly from our type 1 offset units whose phasic activity was precisely coupled to CS+ offset.  
13 Indeed, we found no evidence of ramping type activity in our sample of vPAG units. This is perhaps  
14 unsurprising because the experimental paradigm of Wright and McDannald (2019) differed from ours  
15 in a number of important ways. In particular, they used a trace fear conditioning protocol where the  
16 aversive footshock was paired in each session with the auditory cue with a varying probability of  
17 occurrence. The closest comparison with our results is between our acquisition sessions and their  
18 trials when the probability of a footshock was 100% (their Fig. 1). We observed an increase in activity  
19 immediately after the footshock and observed a progressive reduction in activity that resembled the  
20 change in firing after peak in their ramping units (our Fig. 1C).

21 An unanswered question concerns the origin of CS+ offset responses in vPAG. Our ERP data are  
22 consistent with offset responses being generated by synaptic input to the PAG, and we estimate that  
23 they occur approximately 29ms after end of the CS+ tone. Such a delay provides ample opportunity  
24 for many possible pathways to generate them. Detecting the offset (and onset) of sensory events is a  
25 fundamental requirement of sensory processing by the CNS. Given the importance in the present  
26 experiments of the auditory system in the initial processing of the tone signals used for fear  
27 conditioning, one option is a route from the auditory cortex to the PAG. Both onset and offset  
28 responses have been reported in the auditory cortex elicited by tones and other sounds in a range of  
29 species (Qin et al., 2007; Tian et al., 2013; Liu et al., 2019). Also, changes in activity in the auditory  
30 association cortex during fear conditioning have been shown to precede the expected time of the  
31 unconditioned stimulus (Quirk et al., 1997). In principle, such activity occurs sufficiently in advance of  
32 our CS+ offset responses to be driving them. However, pathways from the auditory system to the PAG  
33 target its dorsolateral and lateral sectors and are associated with sound driven flight behaviour (e.g.  
34 Wang *et al.*, 2019), so presumably some other pathway is responsible. For example, the medial

1 prefrontal cortex and the bed nucleus of stria terminalis have extensive projections to the PAG  
2 (Holstege et al., 1985; An et al., 1998), and after fear conditioning both show sustained changes in  
3 activity during presentation of the CS+ (Haufler et al., 2013; Gilmartin et al., 2014).

4 A further important question relates to what information CS+ offset responses encode. Learning  
5 theory proposes that Pavlovian fear conditioning is instructed by an error signal that encodes the  
6 difference between actual and expected intensity of the US (Rescorla & Wagner, 1972; McNally et al.,  
7 2011). The vPAG is generally considered to provide the teaching signal that encodes aversive  
8 prediction error to regulate synaptic plasticity in the amygdala and prefrontal cortex during fear  
9 extinction learning (Johansen et al., 2010; McNally et al., 2011; Roy et al., 2014; Walker et al., 2019;  
10 Frontera et al., 2020). According to the Rescorla-Wagner learning model this teaching signal is  
11 modulated by expectation of the US – during retrieval of a fear conditioned association the  
12 unreinforced CS+ produces a negative prediction error signal because the US has not occurred as  
13 expected. The reliability of this prediction is reduced with successive presentations of the  
14 unreinforced CS+. If fear extinction is instructed by this error signal, then neurons encoding prediction  
15 errors would be expected to progressively decrease their CS+ induced firing rate upon repeated  
16 omission of the expected US (McNally et al., 2011). In the present study the gradual reduction in CS+  
17 type 1 offset responses in vPAG during extinction training are entirely consistent with this proposition.  
18 However, in our trace conditioning experiment the failure of CS+ offset responses to follow the timing  
19 of the expected US would seem to argue against this, although the 1 sec time interval we used may  
20 have been too short for rats to discriminate. Another possibility is the CS+ offset response is signalling  
21 saliency of the tone, but this can also be thought of as a component of generating prediction error.  
22 Clearly, further studies are required, but the current findings open new avenues for investigating the  
23 role of vPAG in encoding fear memory.

24 We also show that inactivation of the cerebellar output nucleus MCN disrupts but does not abolish  
25 CS+ type 1 offset responses in vPAG. This is line with MCN modulating vPAG activity (Vaaga et al.,  
26 2020), but advances understanding by raising the possibility that the vermal compartment of the  
27 cerebellum is involved in the timing but not the origin of CS+ offset signals in vPAG. Consistent with  
28 this idea is the finding that in mice, phasic optogenetic stimulation of the MCN-vPAG pathway during  
29 CS+ offset significantly enhanced extinction learning, while tonic activation using chemogenetics had  
30 the opposite effect, suggesting that the temporal pattern of activation of vPAG neurons by MCN  
31 determines the effect on extinction learning (Frontera et al., 2020).

32 More generally, a role of MCN in temporal patterning is in good agreement with the timing hypothesis  
33 of cerebellar function (Ivry, 1997; Cheron et al., 2016; D'Angelo, 2018). This hypothesis proposes that

1 the cerebellum not only regulates the timing of movement to enable coordinated behaviour and  
2 motor learning, but that this timing regulation extends to other functions of the CNS, including  
3 perceptual tasks that require the precise timing of salient events (Spencer et al., 2013). The present  
4 study extends this concept to the encoding of fear memory by vPAG. Our findings indicate that the  
5 cerebellum is important for the regulation of fear memory processes at multiple timescales: at the  
6 millisecond timescale to control CS+ offset timing within vPAG, and at longer timescales (hours/days)  
7 to regulate the rate of fear extinction and timing of expression of multiple fear-related behaviours.  
8 We provide evidence that MCN is not only involved in fear conditioned freezing behaviour but that it  
9 is also involved in the expression of USVs during acquisition and rearing behaviour during retrieval. It  
10 is tempting to speculate that MCN regulation of vPAG encoding of CS+ offset underlies some if not all  
11 of these behavioural effects, but this remains to be determined.

12

13 Cerebellar manipulations can affect emission of USVs (Fujita et al., 2008, 2012; Umeda et al., 2010;  
14 Fujita-Jimbo et al., 2014). Taken together with our USV results this raises the possibility that the MCN-  
15 vPAG pathway regulates the emission of USVs at a time when danger is greatest, perhaps as a warning  
16 signal to conspecifics. Similarly, reduced rearing behaviour during early extinction may be a survival  
17 strategy to minimise detection by a predator at time when the probability of a threat is greatest. It is  
18 noteworthy that MCN receives its cerebellar cortical input from the cerebellar vermis and lesions of  
19 the pyramis (vermal lobule VIII) in rats result in deficits in innate and conditioned freezing behaviour  
20 but also a concomitant increase in risk assessment behaviours including rearing (Koutsikou et al.,  
21 2014). This suggests that expression of survival behaviours is regulated by the cerebellum in a context  
22 dependent manner. Our results also suggest that activity in the MCN-vPAG pathway during acquisition  
23 regulates the subsequent rate of fear extinction. This is consistent with a previous study in mice  
24 (Frontera et al., 2020) and suggests this is a function that is conserved across species. Outbred strains  
25 of rats have been shown to demonstrate different behavioural phenotypes during fear extinction (Ji  
26 et al., 2018) where a proportion of animals show faster rates of extinction than others. Interruption  
27 of MCN-vPAG interaction during acquisition or early consolidation may therefore contribute to an  
28 anxiety-like behavioural phenotype, with wider implications for possible neural mechanisms that  
29 underly psychiatric disorders such as PTSD.

30 In summary, MCN regulates precise temporal encoding of fear memory within vPAG and also regulates  
31 the expression of different survival behaviours depending on the phase of Pavlovian fear conditioning.  
32 During early extinction MCN output suppresses rearing, while a direct pathway to the vPAG appears to  
33 be important in eliciting fear related USVs during acquisition, and the rate of expression of freezing



1 during early extinction. The cerebellum through its interactions with the survival network might  
2 therefore be coordinating the most appropriate behavioural response at the most appropriate time.

3

#### 4 **Methods**

5 *Animals:* All animal procedures were performed in accordance with the UK Animals (Scientific  
6 Procedures) Act of 1986 and were approved by the University of Bristol Animal Welfare and Ethical  
7 Review Body. A total of 34 adult male Sprague Dawley rats (280-400g; Harlan Laboratories) were used  
8 in this study. They were housed under normal environmental conditions in a normal 12 h dark/light  
9 cycle and provided with food and water *ad libitum*. Animals were single housed after surgery to  
10 prevent damage to implants.

#### 11 *Surgical procedures for chronic implants:*

12 Rats were anaesthetised initially with gaseous isoflurane, followed by intraperitoneal injections with  
13 ketamine and medetomidine (5mg/100g of Narketan 10 and Domitor, Vetoquinol). Each animal was  
14 mounted in a stereotaxic frame with atraumatic ear bars and surgery was performed under aseptic  
15 conditions. Depth of anaesthesia was monitored regularly by testing corneal and paw withdrawal  
16 reflexes with supplementary doses of ketamine/medetomidine given as required. A midline scalp  
17 incision was made, and craniotomies were performed above the cerebellum and/or the PAG as  
18 required in each line of experiment. At the end of every surgery, the rat was administered the  
19 analgesic Metacam (Boehringer Ingelheim, 1 mg/Kg) and the medetomidine antidote Atipamezole  
20 (Antisedan, Vetoquinol 0.1mg I.P.). Tetrodes, cannula and/or viral injections were carried out as  
21 described below depending on the experiment. Animals were handled for 1 week prior to surgery and  
22 during recovery before any behavioural paradigms or electrophysiological recordings.

#### 23 *Electrophysiological recording (n= 15 rats):*

24 1. Dual microdrive experiments (n=7 rats). Two in-house built microdrives, designed to slot closely  
25 next to each other, were positioned over craniotomies to allow tetrodes to be independently  
26 advanced into the right MCN (11.4 mm caudal from bregma, 1 mm lateral from midline, depth of  
27 4mm) and contralateral vPAG (7.5 mm caudal from bregma, 1 mm lateral from midline, depth 4.8mm).  
28 The microdrives were attached to the skull with screws and dental acrylic cement. Each microdrive  
29 contained 3-4 tetrodes for local field potential (LFP) and single unit recording (0.0008-inch Tungsten  
30 wire 99.95% CS 500 HML, insulated with VG Bond, 20 µm inner diameter, impedance 100-400 KΩ after  
31 gold plating; California Fine Wire). 2. Single microdrive experiments (n=8 rats). These implants were



1 the same as described above except only one microdrive was implanted to record single units from  
2 the vPAG, and infusion cannulae were implanted bilaterally (n=8) to target the MCN (details below).

3 *Anatomical pathway tracing (n=7 rats):*

4 To anterogradely map direct connections between MCN and vPAG, 100 nl of an adeno associated viral  
5 (AAV) vector expressing tdTomato under the CAG promoter was injected unilaterally into the MCN  
6 (11.4 mm caudal from bregma, 1 mm lateral from midline, depth of 4.5 mm). pAAV-CAG-tdTomato  
7 (codon diversified) was a gift from Edward Boyden (Addgene viral prep # 59462-AAV1;  
8 <http://n2t.net/addgene:59462>; RRID:Addgene 59462). Injections of the AAV were made following  
9 previously published methods (Hirschberg et al., 2017). In brief, the glass micropipette was  
10 connected to a 25 µl syringe (Hamilton, Bonaduz, Switzerland) via tubing filled with mineral oil, and  
11 was then backfilled with virus using a syringe driver (AL-1000, World Precision Instruments). To  
12 monitor progress of the injection, movement of the oil-vector capillary interface was monitored.  
13 Injections were made at 200 nl/min and the pipette left in situ for 5 min prior to removal.

14 *Inhibitory DREADD surgery (n=19 rats):*

15 For the inhibitory DREADD experiments two adeno associated viral (AAV) vectors were used: a control,  
16 pAAV-hSyn-EGFP (AAV5); and an inhibitory DREADD, pAAV-hSyn-hM4D(Gi)-mCherry (AAV5) (both  
17 gifts from Bryan Roth, Addgene viral prep # 50465-AAV5 and # 50475-AAV5). Using the same  
18 techniques as outlined above, animals were injected bilaterally into MCN with 350 nl of either the  
19 control (n=9) or the inhibitory DREADD (n=10). In the same surgery bilateral cannulae (26-gauge guide  
20 cannula, PlasticsOne) were also chronically implanted with tips (33 gauge internal) located just above  
21 the vPAG (7.5mm caudal from bregma, 0.8 mm lateral from midline, at a depth of 5 mm).

22 *Behavioural protocols:*

23 *Auditory cued fear conditioning (n= 34 rats).* The delay conditioning paradigm was based on Watson  
24 et al (2016, Fig. 1A). On day 0 all animals underwent a session of habituation to the Skinner box (Med  
25 Associates Inc., St Albans, VT, USA) to act as a baseline for analysis prior to a session of acquisition  
26 (day 1). During acquisition, the conditioned stimulus (CS, 2KHz, 10sec tone) was paired 7x with an  
27 unconditioned stimulus (US, 0.5 s footshock, 0.75mA) delivered at the end of the tone, except in one  
28 animal where the timing of the US was delayed 1sec after the CS. This was followed by a session of  
29 extinction training (day 2). During extinction, 5 blocks of 7 tone presentations (trials) were repeated.  
30 The first two blocks (trials 1-14) were defined as early extinction (EE), when the animal was exhibiting  
31 high levels of freezing, while the last two blocks (trials 21-35) were defined as late extinction (LE),  
32 when the animals were exhibiting low levels of freezing.

1 *Balance beam (n= 18 rats)*. This test was used to assess general motor coordination and balance  
2 (Luong et al., 2011). Animals were trained for 3 consecutive days to cross 6 times a 160 cm long beam  
3 that ended on an enclosed safety platform. On each day, the beam was progressively thinner in width  
4 (6 cm, 4 cm and 2 cm). The 2 cm beam was then used for the test day. Baseline performance was  
5 recorded and then CNO (Clozapine N-oxide) was given either i.p. or by intracranial infusion (for details  
6 see below) and after an interval of 15 minutes the animal was re-tested on the beam. Beam balance  
7 performance was manually scored using Solomon Coder software (© 2019 by András Péter), by  
8 scoring the time to cross the beam for each trial and the number of foot slips.

9 *Open field (n= 14 rats)*. This test was used to assess both general motor behaviour and anxiety levels.  
10 Animals were exposed for the first time to the arena (round arena with 90 cm diameter, and height of  
11 51 cm) on the test day. They were placed at the perimeter of the arena and were allowed to explore  
12 for 10 minutes. Exploratory behaviour was recorded for the whole session. DeepLabCut (Wei et al.,  
13 2018) was used to track the animal behaviour in the video, the tracking output was then used to  
14 calculate total distance covered and time spent in two equivalent areas of the arena, a central and a  
15 peripheral one.

16 *Elevated plus maze (n= 18 rats)*. This test was used as an additional assessment of anxiety (Pellow et  
17 al., 1985). Animals were placed in a plus shaped maze, 1m above the floor, with 2 open and 2 closed  
18 arms (10 cm wide and 50 cm length) and allowed to explore the maze for 5 minutes. Elevated plus  
19 maze performance was manually scored using Solomon encoder software (© 2019 by András Péter)  
20 to calculate total time spent in open versus closed arms and the number of entries into each arm.

#### 21 *Data acquisition and analysis:*

22 *Electrophysiological recording*. Multisite electrophysiological data were recorded using a Blackrock  
23 Microsystems (Utah, USA) data capture system synchronised with OptiTrak software. Neural data  
24 were sampled at 30kHz and band pass filtered online between 300Hz-6kHz.

25 *Ultrasonic vocalisation recordings*. USVs emitted at 22kHz were recorded using an ANL-940-1  
26 Ultrasonic Microphone and Amplifier (Med Associates, Inc.) connected to the Blackrock Microsystems  
27 (Utah, USA). Although USVs were recorded as an aliased signal (the maximum sampling rate of the  
28 recording system was 30kHz, while the optimal sampling rate was 44kHz) we were able to reliably  
29 identify all USV events. For analysis, USVs were visualised using Spike7 software (Cambridge Electronic  
30 Design Limited) and individual USV emissions manually identified and the total number during each  
31 recording session was counted.

1 *Auditory cued fear conditioning.* Video recording of animal behaviour during the fear conditioning  
2 paradigm was captured with an OptiTrak camera and software, allowing synchronisation with neural  
3 data. Fear-related freezing behaviour was manually scored using Solomon Coder software (© 2019 by  
4 András Péter). Freezing behaviour was identified as periods of time longer than 2s in which the animal  
5 had an absence of movement (except those associated with respiration and eye movements,  
6 Blanchard & Blanchard, 1969) while typically maintaining a crouching position. Percentages of time  
7 spent freezing were calculated for each trial during CS+ presentations and during inter-CS+ intervals.  
8 To evaluate the extinction rate of freezing behaviour, the slope of the intercept of freezing % for all  
9 trials was calculated. Rearing activity was counted as events in which the animal was standing upright  
10 on its rear limbs. The number of rearing events during CS+ presentations and inter-CS+ intervals was  
11 counted.

12 *Control behavioural tests:* Beam balance, open field and elevated plus maze tests were recorded via  
13 standard webcams linked to OBS (Open Broadcaster Software; © 2012-2020).

14 *Inactivation experiments (n= 4).* In 4 animals muscimol (Sigma Aldrich, 0.3ul, at a rate of 0.3ul/min) (or  
15 saline; n = 4 animals) was infused via indwelling cannulae at a rate of 0.3ul/min to target MCN. The  
16 infusion was made immediately after acquisition (i.e., during early consolidation). Extinction training  
17 was carried out 48 hours after the infusion.

18 *Inhibitory DREADD experiments:*

19 A total of 19 animals were randomly assigned to either a saline control (n=9) or a DREADD  
20 experimental group (n=10) and coded so the experimenter was blinded. Unblinding occurred once all  
21 procedures and analysis were completed. Six weeks after viral transfection (see above), animals were  
22 tested in the following behavioural paradigms: auditory cued fear conditioning, beam balance, open  
23 field and elevated plus maze. One animal was excluded from the study after the fear conditioning test  
24 because of poor health; a further 3 animals were excluded from the open field analysis because of  
25 technical problems with the video recording. In every animal a volume of 500 nl of CNO (3 µM, Tocris)  
26 was infused at a rate of 0.5 µl/min to target the PAG, 15 minutes prior to each behavioural test  
27 (infusion pump Harvard Apparatus, PHD 2000 Infusion). During fear conditioning, since the effect of  
28 CNO is estimated to last 60-90 mins (Stachniak et al., 2014; Jendryka et al., 2019) this meant the  
29 pathway was likely to be inhibited during both acquisition and also a period of early consolidation. In  
30 one experiment, to verify functional activity of hM4D(Gi) receptors in the CNS following MCN  
31 transfection with inhibitory DREADD, CNO was injected i.p. (2.5 mg/Kg) 20 minutes before the beam  
32 balance test.

33

1 Histology:

2 At experimental end points all animals were deeply anaesthetized (Euthatal, 200 mg ml<sup>-1</sup>, Merial  
3 Animal Health) and terminated by transcardial perfusion (4% paraformaldehyde in 0.1 M phosphate  
4 buffer) and the brains extracted. After post-fixation, the brains were cryoprotected in 30% sucrose  
5 solution. The cerebellum was cut sagittally and the midbrain including the PAG cut coronally, into  
6 sections of 40 or 60 µm thickness, respectively. To aid verification of electrode and cannula brain loci,  
7 sections were stained with cresyl violet. For visualisation of viral expression immunohistochemistry  
8 anti-mCherry (1:2000, Anti-mCherry Polyclonal Antibody host rabbit, BioVision, with 5% normal horse  
9 serum (NHS); 1:1000, Alexafluor 594 donkey anti Rabbit IgG, Molecular probes) was performed. No  
10 signal amplification was required for the eGFP controls. Sections were visualised on an Axioskop 2 Plus  
11 microscope (Zeiss) and photomicrographs captured using AxioVision software, or with a widefield  
12 microscope (Leica DMI6000, with Leica DFC365FX camera and Leica LASX live cell imaging workstation  
13 software).

14 Neural data analysis:

15 *Spike sorting.* Offline spike sorting was carried out using MClust software in Matlab. Clustering was  
16 classified as single unit if L ratio < 0.35, ID >15 and < 1% of interspike intervals was > 2ms (See  
17 Schmitzer-Torbert *et al.*, 2005). The firing rate of individual units was taken from MClust and verified  
18 using NeuroExplorer.

19 *Data analysis of single units:*

20 For habituation and acquisition recording sessions peri event time histograms (PETHs, 40ms time bins)  
21 of the activity of individual units were created in NeuroExplorer with tone onset and offset as time  
22 zero. During acquisition, the footshock caused electrical interference so it was not possible to analyse  
23 unit activity during the 0.5 sec period of stimulus delivery. The following analysis was performed on  
24 MATLAB. In all experimental groups PETHs of unit activity to the unreinforced conditioned tone (CS+)  
25 during extinction training were constructed for individual units over all trials (1-35) and also separately  
26 for early extinction (trials 1-14) and late extinction trials (21-35). PETHs were z-score normalised to a  
27 5 second baseline recording of unit activity before tone onset and data grouped to show the average  
28 of all unit responses and separated into different unit response types. A significant response was  
29 defined as 1 or more consecutive 40 ms time bins where the z-score was  $\pm 2$  SD from baseline mean.  
30 The peak response was measured as maximal value found within the first 25x40 ms bins after tone  
31 onset or offset. The area of the response was calculated as the trapezoidal numerical integration of  
32 the first 25x40 ms bins after tone onset or offset.

1 *Data analysis of Local field potential.* Local field potential (LFP) data were averaged in relation to tone  
2 onset and offset using MATLAB (n= 14 trials per mean of each animal). The tetrode recording site  
3 yielding the largest mean peak to trough response was identified in each animal and used to calculate  
4 group average data of peak amplitude of LFP response recorded in the PAG and cerebellum.

5 *Statistical analysis.* Statistical analysis and graphs were performed with GraphPad Prism 9. Data was  
6 shown as mean  $\pm$  S.E.M., except for rearing behaviour and USVs that were shown as median  $\pm$  IQR.  
7 Paired t-tests or Wilcoxon test (for USVs and rearing behaviour) were used for within group  
8 comparison, while unpaired t-tests or Mann Whitney test (for USVs and rearing behaviour) and  
9 ANOVA were used to compare groups. Differences were considered significant at  $p < 0.05$ .

10 Acknowledgments: We gratefully acknowledge Ms Rachel Bissett for her help with histological  
11 processing and the Wolfson Bioimaging Facility for their support and assistance. We would like to  
12 thank Bryan Roth and Edward Boyden for supplying the viral vectors used in this work. This work was  
13 supported by BBSRC grant BB/MO19616/1 and a Wellcome Trust PhD studentship 203775/Z/16/Z.

14 Competing interests: The authors declare that no competing interests exist.

15 References:

- 16 Albert, Dempsey, & Sorenson. (1985). Anterior cerebellar vermal stimulation: Effect on behavior and  
17 basal forebrain neurochemistry in rat. *Biological Psychiatry*, 20(12), 1267–1276.  
18 [https://doi.org/10.1016/0006-3223\(85\)90111-8](https://doi.org/10.1016/0006-3223(85)90111-8)
- 19 An, Bandler, Öngür, & Price. (1998). Prefrontal cortical projections to longitudinal columns in the  
20 midbrain periaqueductal gray in macaque monkeys. *Journal of Comparative Neurology*, 401(4),  
21 455–479. [https://doi.org/10.1002/\(SICI\)1096-9861\(19981130\)401:4<455::AID-CNE3>3.0.CO;2-6](https://doi.org/10.1002/(SICI)1096-9861(19981130)401:4<455::AID-CNE3>3.0.CO;2-6)
- 22 Apps, & Strata. (2015). Neuronal circuits for fear and anxiety — the missing link. *Nature Reviews*  
23 *Neuroscience*, 16(SEPTEMBER), 4–6. <https://doi.org/10.1038/nrn4028>
- 24 Asdourian, & Frerichs. (1970). Some effects of cerebellar stimulation. *Psychonomic Science*, 18(5),  
25 261–262. <https://doi.org/10.3758/BF03331817>
- 26 Bares, Lungu, Liu, Waechter, Gomez, & Ashe. (2007). Impaired predictive motor timing in patients  
27 with cerebellar disorders. *Experimental Brain Research*, 180(2), 355–365.  
28 <https://doi.org/10.1007/s00221-007-0857-8>
- 29 Blanchard, & Blanchard. (1969). Crouching as an index of fear. *Journal of Comparative and*  
30 *Physiological Psychology*, 67(3), 370–375. <https://doi.org/10.1037/h0026779>
- 31 Bremner, Staib, Kaloupek, Southwick, Soufer, & Charney. (1999). Neural correlates of exposure to  
32 traumatic pictures and sound in Vietnam combat veterans with and without posttraumatic  
33 stress disorder: A positron emission tomography study. *Biological Psychiatry*, 45(7), 806–816.  
34 [https://doi.org/10.1016/S0006-3223\(98\)00297-2](https://doi.org/10.1016/S0006-3223(98)00297-2)
- 35 Cacciola, Bertino, Basile, Di Mauro, Calamuneri, Chillemi, Duca, Bruschetta, Flace, Favaloro, Calabrò,  
36 Anastasi, & Milardi. (2019). Mapping the structural connectivity between the periaqueductal  
37 gray and the cerebellum in humans. *Brain Structure and Function*, 224(6), 2153–2165.

- 1 <https://doi.org/10.1007/s00429-019-01893-x>
- 2 Cheron, Márquez-Ruiz, & Dan. (2016). Oscillations, Timing, Plasticity, and Learning in the  
3 Cerebellum. In *Cerebellum* (Vol. 15, Issue 2, pp. 122–138). Springer New York LLC.  
4 <https://doi.org/10.1007/s12311-015-0665-9>
- 5 Clelland, Choi, Romberg, Jr, Fragniere, & Tyers. (2010). *NIH Public Access*. 325(5937), 210–213.  
6 <https://doi.org/10.1126/science.1173215.A>
- 7 D’Angelo. (2018). Physiology of the cerebellum. In *Handbook of Clinical Neurology* (Vol. 154, pp. 85–  
8 108). Elsevier B.V. <https://doi.org/10.1016/B978-0-444-63956-1.00006-0>
- 9 Frontera, Aissa, Sala, Mailhes-Hamon, Georgescu, Léna, & Popa. (2020). Bidirectional control of fear  
10 memories by cerebellar neurons projecting to the ventrolateral periaqueductal grey. *Nature*  
11 *Communications* 2020 11:1, 11(1), 1–17. <https://doi.org/10.1038/s41467-020-18953-0>
- 12 Fujita-Jimbo, & Momoi. (2014). Specific expression of FOXP2 in cerebellum improves ultrasonic  
13 vocalization in heterozygous but not in homozygous Foxp2 (R552H) knock-in pups.  
14 *Neuroscience Letters*, 566, 162–166. <https://doi.org/10.1016/j.neulet.2014.02.062>
- 15 Fujita, Tanabe, Imhof, Momoi, & Momoi. (2012). Cadm1-Expressing synapses on Purkinje cell  
16 dendrites are involved in mouse ultrasonic vocalization activity. *PLoS ONE*, 7(1).  
17 <https://doi.org/10.1371/journal.pone.0030151>
- 18 Fujita, Tanabe, Shiota, Ueda, Suwa, Momoi, & Momoi. (2008). Ultrasonic vocalization impairment of  
19 Foxp2 (R552H) knockin mice related to speech-language disorder and abnormality of Purkinje  
20 cells. *Proceedings of the National Academy of Sciences of the United States of America*, 105(8),  
21 3117–3122. <https://doi.org/10.1073/pnas.0712298105>
- 22 Gilmartin, Balderston, & Helmstetter. (2014). Prefrontal cortical regulation of fear learning. *Trends in*  
23 *Neurosciences*, 37(8), 455–464. <https://doi.org/10.1016/j.tins.2014.05.004>
- 24 Harris, Golder, & Likhtik. (2017). Multisite Electrophysiology Recordings in Mice to Study Cross-  
25 Regional Communication During Anxiety. In *Current Protocols in Neuroscience* (pp. 8.40.1-  
26 8.40.21). John Wiley & Sons, Inc. <https://doi.org/10.1002/cpns.32>
- 27 Haufler, Nagy, & Pare. (2013). Neuronal correlates of fear conditioning in the bed nucleus of the stria  
28 terminalis. *Learning and Memory*, 20(11), 633–641. <https://doi.org/10.1101/lm.031799.113>
- 29 Heinricher, Cheng, & Fields. (1987). Evidence for two classes of nociceptive modulating neurons in  
30 the periaqueductal gray. *Journal of Neuroscience*, 7(1), 271–278.  
31 <https://doi.org/10.1523/jneurosci.07-01-00271.1987>
- 32 Herry, Ferraguti, Singewald, Letzkus, Ehrlich, & Lüthi. (2010). Neuronal circuits of fear extinction. In  
33 *European Journal of Neuroscience* (Vol. 31, Issue 4, pp. 599–612). Eur J Neurosci.  
34 <https://doi.org/10.1111/j.1460-9568.2010.07101.x>
- 35 Hirschberg, Li, Randall, Kremer, & Pickering. (2017). Functional dichotomy in spinal- vs prefrontal-  
36 projecting locus coeruleus modules splits descending noradrenergic analgesia from ascending  
37 aversion and anxiety in rats. *eLife*, 6, e29808. <https://doi.org/10.7554/eLife.29808>
- 38 Holstege, Meiners, & Tan. (1985). Projections of the bed nucleus of the stria terminalis to the  
39 mesencephalon, pons, and medulla oblongata in the cat. *Experimental Brain Research*, 58(2),  
40 379–391. <https://doi.org/10.1007/BF00235319>
- 41 Ivry. (1997). Cerebellar timing systems. *International Review of Neurobiology*, 41, 555–573.  
42 [https://doi.org/10.1016/s0074-7742\(08\)60370-0](https://doi.org/10.1016/s0074-7742(08)60370-0)



- 1 Jendryka, Palchadhuri, Ursu, van der Veen, Liss, Kätzel, Nissen, & Pekcec. (2019). Pharmacokinetic  
2 and pharmacodynamic actions of clozapine-N-oxide, clozapine, and compound 21 in DREADD-  
3 based chemogenetics in mice. *Scientific Reports*, *9*(1). [https://doi.org/10.1038/s41598-019-](https://doi.org/10.1038/s41598-019-41088-2)  
4 [41088-2](https://doi.org/10.1038/s41598-019-41088-2)
- 5 Ji, Yakhnitsa, Kiritoshi, Presto, & Neugebauer. (2018). Fear extinction learning ability predicts  
6 neuropathic pain behaviors and amygdala activity in male rats. *Molecular Pain*, *14*.  
7 <https://doi.org/10.1177/1744806918804441>
- 8 Johansen, Tarpley, LeDoux, & Blair. (2010). Neural substrates for expectation-modulated fear  
9 learning in the amygdala and periaqueductal gray. *Nature Neuroscience*, *13*(8), 979–986.  
10 <https://doi.org/10.1038/nn.2594>
- 11 Johansson, Hesslow, & Medina. (2016). Mechanisms for motor timing in the cerebellar cortex. In  
12 *Current Opinion in Behavioral Sciences* (Vol. 8, pp. 53–59). Elsevier Ltd.  
13 <https://doi.org/10.1016/j.cobeha.2016.01.013>
- 14 Kim, Horovitz, Pellman, Tan, Li, Richter-Levin, & Kim. (2013). Dorsal periaqueductal gray-amygdala  
15 pathway conveys both innate and learned fear responses in rats. *Proceedings of the National*  
16 *Academy of Sciences of the United States of America*, *110*(36), 14795–14800.  
17 <https://doi.org/10.1073/pnas.1310845110>
- 18 Koch, Oliveri, Torriero, Salerno, Gerfo, & Caltagirone. (2007). Repetitive TMS of cerebellum  
19 interferes with millisecond time processing. *Experimental Brain Research*, *179*(2), 291–299.  
20 <https://doi.org/10.1007/s00221-006-0791-1>
- 21 Koutsikou, Crook, Earl, Leith, Watson, Lumb, & Apps. (2014). Neural substrates underlying fear-  
22 evoked freezing: the periaqueductal grey-cerebellar link. *The Journal of Physiology*, *592*(10),  
23 2197–2213. <https://doi.org/10.1113/jphysiol.2013.268714>
- 24 Liu, Whiteway, Sheikhattar, Butts, Babadi, & Kanold Correspondence. (2019). Parallel Processing of  
25 Sound Dynamics across Mouse Auditory Cortex via Spatially Patterned Thalamic Inputs and  
26 Distinct Areal Intracortical Circuits. *CellReports*, *27*, 872-885.e7.  
27 <https://doi.org/10.1016/j.celrep.2019.03.069>
- 28 Luong, Carlisle, Southwell, & Patterson. (2011). Assessment of motor balance and coordination in  
29 mice using the balance beam. *Journal of Visualized Experiments : JoVE*, *49*.  
30 <https://doi.org/10.3791/2376>
- 31 McNally, Johansen, & Blair. (2011). Placing prediction into the fear circuit. *Trends in Neurosciences*,  
32 *34*(6), 283–292. <https://doi.org/10.1016/j.tins.2011.03.005>
- 33 Milad, & Quirk. (2012). Fear extinction as a model for translational neuroscience: Ten years of  
34 progress. In *Annual Review of Psychology* (Vol. 63, pp. 129–151). NIH Public Access.  
35 <https://doi.org/10.1146/annurev.psych.121208.131631>
- 36 Nisimaru, Mittal, Shirai, Sooksawate, Anandaraj, Hashikawa, Nagao, Arata, Sakurai, Yamamoto, &  
37 Ito. (2013). Orexin-neuromodulated cerebellar circuit controls redistribution of arterial blood  
38 flows for defense behavior in rabbits. *Proceedings of the National Academy of Sciences of the*  
39 *United States of America*, *110*(35), 14124–14131. <https://doi.org/10.1073/pnas.1312804110>
- 40 Ouda, Jílek, & Syka. (2016). Expression of c-Fos in rat auditory and limbic systems following 22-kHz  
41 calls. *Behavioural Brain Research*, *308*, 196–204. <https://doi.org/10.1016/j.bbr.2016.04.030>
- 42 Ozawa, Ycu, Kumar, Yeh, Ahmed, Koivumaa, & Johansen. (2017). A feedback neural circuit for  
43 calibrating aversive memory strength. *Nature Neuroscience*, *20*(1), 90–97.  
44 <https://doi.org/10.1038/nn.4439>

- 1 Pellow, Chopin, File, & Briley. (1985). Validation of open : closed arm entries in an elevated plus-  
2 maze as a measure of anxiety in the rat. *Journal of Neuroscience Methods*, 14(3), 149–167.  
3 [https://doi.org/10.1016/0165-0270\(85\)90031-7](https://doi.org/10.1016/0165-0270(85)90031-7)
- 4 Qin, Chimoto, Sakai, Wang, & Sato. (2007). Comparison Between Offset and Onset Responses of  
5 Primary Auditory Cortex – Neurons in Awake Cats. *Journal of Neurophysiology*, 97(5), 3421–  
6 3431. <https://doi.org/10.1152/jn.00184.2007>
- 7 Quirk, Armony, & LeDoux. (1997). Fear conditioning enhances different temporal components of  
8 tone-evoked spike trains in auditory cortex and lateral amygdala. *Neuron*, 19(3), 613–624.  
9 [https://doi.org/10.1016/S0896-6273\(00\)80375-X](https://doi.org/10.1016/S0896-6273(00)80375-X)
- 10 Rescorla, R. Wagner. (1972). A theory of Pavlovian conditioning: Variations in the effectiveness of  
11 reinforcement and nonreinforcement. *Classical Conditioning II: Current Research and Theory*,  
12 *January 1972*, 64–99.
- 13 Roy, Shohamy, Daw, Jepma, Wimmer, & Wager. (2014). Representation of aversive prediction errors  
14 in the human periaqueductal gray. *Nature Neuroscience*, 17(11), 1607–1612.  
15 <https://doi.org/10.1038/nn.3832>
- 16 Sacchetti, B., Scelfo, & Strata. (2009). Cerebellum and emotional behavior. *Neuroscience*, 162(3),  
17 756–762. <https://doi.org/10.1016/j.neuroscience.2009.01.064>
- 18 Sacchetti, Benedetto, Scelfo, & Strata. (2005). The Cerebellum: Synaptic Changes and Fear  
19 Conditioning. *The Neuroscientist*, 11(3), 217–227. <https://doi.org/10.1177/1073858405276428>
- 20 Sanders, Klein, Mayer, Heym, & Handwerker. (1980). Differential effects of noxious and non-noxious  
21 input on neurones according to location in ventral periaqueductal grey or dorsal raphe nucleus.  
22 *Brain Research*, 186(1), 83–97. [https://doi.org/10.1016/0006-8993\(80\)90257-7](https://doi.org/10.1016/0006-8993(80)90257-7)
- 23 Sandner, Schmitt, & Karli. (1987). Mapping of jumping, rearing, squealing and switch-off behaviors  
24 elicited by periaqueductal gray stimulation in the rat. *Physiology & Behavior*, 39(3), 333–339.  
25 [https://doi.org/10.1016/0031-9384\(87\)90231-9](https://doi.org/10.1016/0031-9384(87)90231-9)
- 26 Schmitzer-Torbert, Jackson, Henze, Harris, & Redish. (2005). Quantitative measures of cluster quality  
27 for use in extracellular recordings. *Neuroscience*, 131(1), 1–11.  
28 <https://doi.org/10.1016/j.neuroscience.2004.09.066>
- 29 Scholl, Gao, & Wehr. (2010). Nonoverlapping Sets of Synapses Drive On Responses and Off  
30 Responses in Auditory Cortex. *Neuron*, 65(3), 412–421.  
31 <https://doi.org/10.1016/j.neuron.2010.01.020>
- 32 Sharma, Sinha, Mathur, & Nayar. (1999). Neuronal responses of periaqueductal gray to peripheral  
33 noxious stimulation. *Indian Journal of Physiology and Pharmacology*, 43(4), 449–457.  
34 <https://europepmc.org/article/med/10776460>
- 35 Solyga, & Barkat. (2019). Distinct processing of tone offset in two primary auditory cortices. *Scientific*  
36 *Reports*, 9(1), 1–12. <https://doi.org/10.1038/s41598-019-45952-z>
- 37 Spencer, & Ivry. (2013). Cerebellum and timing. In *Handbook of the Cerebellum and Cerebellar*  
38 *Disorders* (pp. 1201–1220). Springer Netherlands. [https://doi.org/10.1007/978-94-007-1333-8\\_52](https://doi.org/10.1007/978-94-007-1333-8_52)  
39
- 40 Stachniak, Ghosh, & Sternson. (2014). Chemogenetic Synaptic Silencing of Neural Circuits Localizes a  
41 Hypothalamus→Midbrain Pathway for Feeding Behavior. *Neuron*, 82(4), 797–808.  
42 <https://doi.org/10.1016/J.NEURON.2014.04.008>
- 43 Strick, Dum, & Fiez. (2009). Cerebellum and Nonmotor Function. *Annual Review of Neuroscience*,



- 1           32(1), 413–434. <https://doi.org/10.1146/annurev.neuro.31.060407.125606>
- 2   Supple, & Leaton. (1990). Cerebellar vermis: essential for classically conditioned bradycardia in the  
3   rat. *Brain Research*, 509(1), 17–23. [https://doi.org/10.1016/0006-8993\(90\)90303-S](https://doi.org/10.1016/0006-8993(90)90303-S)
- 4   Supple, Leaton, & Fanselow. (1987). Effects of cerebellar vermal lesions on species-specific fear  
5   responses, neophobia, and taste-aversion learning in rats. *Physiology & Behavior*, 39(5), 579–  
6   586. [https://doi.org/10.1016/0031-9384\(87\)90156-9](https://doi.org/10.1016/0031-9384(87)90156-9)
- 7   Takahashi, Nakao, & Kaga. (2004). Cortical mapping of auditory-evoked offset responses in rats.  
8   *NeuroReport*, 15(10), 1565–1569. <https://doi.org/10.1097/01.wnr.0000134848.63755.5c>
- 9   Teune, van der Burg, van der Moer, Voogd, & Ruigrok. (2000). Topography of cerebellar nuclear  
10   projections to the brain stem in the rat. In *Progress in brain research* (Vol. 124, pp. 141–172).  
11   [https://doi.org/10.1016/S0079-6123\(00\)24014-4](https://doi.org/10.1016/S0079-6123(00)24014-4)
- 12   Tian, Kuśmierk, & Rauschecker. (2013). Analogues of simple and complex cells in rhesus monkey  
13   auditory cortex. *Proceedings of the National Academy of Sciences of the United States of*  
14   *America*, 110(19), 7892–7897. <https://doi.org/10.1073/pnas.1221062110>
- 15   Toledo, Lang, Doengi, Morrison, Stein, & Baader. (2019). Merlin modulates process outgrowth and  
16   synaptogenesis in the cerebellum. *Brain Structure and Function*, 224(6), 2121–2142.  
17   <https://doi.org/10.1007/s00429-019-01897-7>
- 18   Tovote, Esposito, Botta, Chaudun, Fadok, Markovic, Wolff, Ramakrishnan, Fenno, Deisseroth, Herry,  
19   Arber, & Lüthi. (2016). Midbrain circuits for defensive behaviour. *Nature*, 534(7606), 206–212.  
20   <https://doi.org/10.1038/nature17996>
- 21   Tovote, Fadok, & Lüthi. (2015). Neuronal circuits for fear and anxiety. *Nature Reviews Neuroscience*,  
22   16(6), 317–331. <https://doi.org/10.1038/nrn3945>
- 23   Umeda, Takashima, Nakagawa, Maekawa, Ikegami, Yoshikawa, Kobayashi, Okanoya, Inokuchi, &  
24   Osumi. (2010). Evaluation of pax6 mutant rat as a model for autism. *PLoS ONE*, 5(12).  
25   <https://doi.org/10.1371/journal.pone.0015500>
- 26   Vaaga, Brown, & Raman. (2020). Cerebellar modulation of synaptic input to freezing-related neurons  
27   in the periaqueductal gray. *ELife*, 9. <https://doi.org/10.7554/eLife.54302>
- 28   Vianna, Graeff, Brandão, & Landeira-Fernandez. (2001). Defensive freezing evoked by electrical  
29   stimulation of the periaqueductal gray: comparison between dorsolateral and ventrolateral  
30   regions. *Neuroreport*, 12(18), 4109–4112. <http://www.ncbi.nlm.nih.gov/pubmed/11742247>
- 31   Walker, P., & Carrive. (2003). Role of ventrolateral periaqueductal gray neurons in the behavioral  
32   and cardiovascular responses to contextual conditioned fear and poststress recovery.  
33   *Neuroscience*, 116(3), 897–912. [https://doi.org/10.1016/S0306-4522\(02\)00744-3](https://doi.org/10.1016/S0306-4522(02)00744-3)
- 34   Walker, R. A., Wright, Jhou, & McDannald. (2019). The ventrolateral periaqueductal grey updates  
35   fear via positive prediction error. *European Journal of Neuroscience*, 51(3), 866–880.  
36   <https://doi.org/10.1111/ejn.14536>
- 37   Wang, Chen, Xu, Sun, Chen, Zhao, Luo, Liu, Guo, Xie, Zhong, Bai, Tian, Mao, Ye, Tao, Li, Farzinpour, Li,  
38   ... Zhang. (2019). Direct auditory cortical input to the lateral periaqueductal gray controls  
39   sound-driven defensive behavior. *PLOS Biology*, 17(8), e3000417.  
40   <https://doi.org/10.1371/journal.pbio.3000417>
- 41   Watson, Cerminara, Lumb, & Apps. (2016). Neural Correlates of Fear in the Periaqueductal Gray. *The*  
42   *Journal of Neuroscience*, 36(50), 12707–12719. [https://doi.org/10.1523/JNEUROSCI.1100-](https://doi.org/10.1523/JNEUROSCI.1100-16.2016)  
43   16.2016

- 1 Wei, & Kording. (2018). Behavioral tracking gets real. *Nature Neuroscience*, 1.  
2 <https://doi.org/10.1038/s41593-018-0215-0>
- 3 Whiteside, & Snider. (1953). Relation of cerebellum to upper brain stem. *Journal of Neurophysiology*,  
4 16(4), 397–413. <https://doi.org/10.1152/jn.1953.16.4.397>
- 5 Wright, & McDannald. (2019). Ventrolateral periaqueductal gray neurons prioritize threat probability  
6 over fear output. *ELife*, 8. <https://doi.org/10.7554/eLife.45013>
- 7 Xu, Liu, Ashe, & Bushara. (2006). Role of the olivo-cerebellar system in timing. *Journal of*  
8 *Neuroscience*, 26(22), 5990–5995. <https://doi.org/10.1523/JNEUROSCI.0038-06.2006>
- 9
- 10

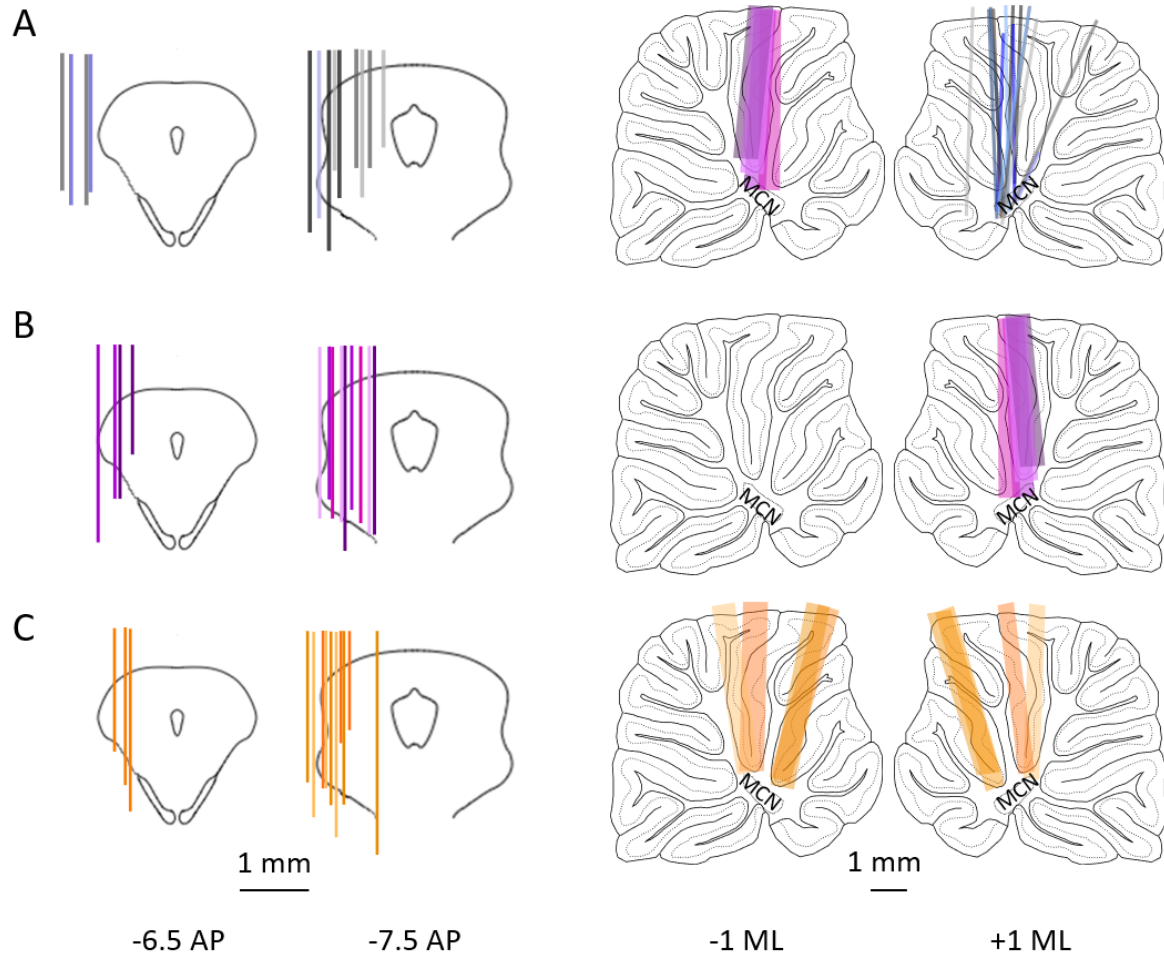

1

2

3 **Supplementary Figure 1. Histological verification of recording electrodes (microdrive implants) and infusion**  
4 **cannulae location.** A) Control animals with dual microdrive implant (n=6 rats, each animal tracks colour coded

5 blue to black); reconstruction of tetode tracks in the vPAG (left, coronal sections at AP levels -6.5 and -7.5) and

6 contralateral MCN (right, sagittal sections  $\pm 1$  mm from midline). B) Animals with single microdrive implant and

7 cannulae used for saline infusions (n= 4 rats, each animal tracks colour coded with purple shade); reconstruction

8 of tetode tracks in the vPAG (left) and cannulae placement in the left and right cerebellar MCN (right). C) Same

9 as B but cannulae used for infusions of muscimol (n= 4 rats, each animal tracks colour coded with orange shade).

10

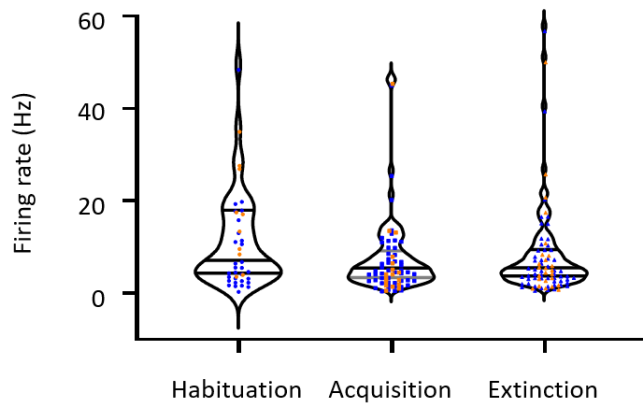

1

2 **Supplementary Figure 2. Firing rate properties.** Violin plots showing distribution of baseline firing rates of all  
3 available single units recorded in vPAG during habituation (n=30 control units, n=10 muscimol units), acquisition  
4 (n=50 control units, n=17 muscimol units) or extinction (n=55 control units, n=25 muscimol units). Horizontal  
5 lines show median and IQR firing rate per phase of conditioning. Blue dots, control data; orange dots, muscimol  
6 data.

7

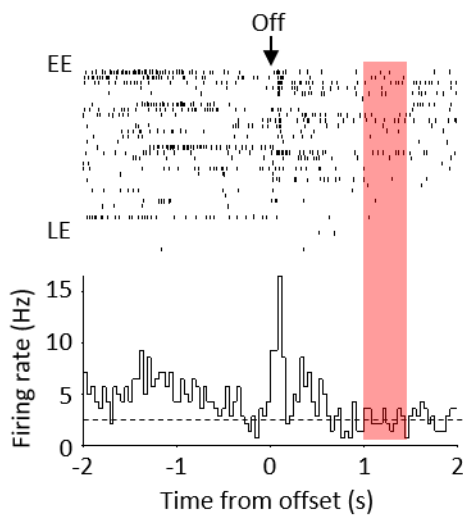

8

9 **Supplementary Figure 3. vPAG offset responses during auditory cued fear trace conditioning.** Example single  
10 unit in vPAG recorded during extinction following acquisition where a 1 second trace was introduced between  
11 CS offset and the US. Raster plot and peri-event time histogram showing activity relative to CS+ offset (arrow in  
12 raster and time zero in PETH). Onset and duration of the US during acquisition is shown by red shaded area;  
13 PETH 40ms bins.

14

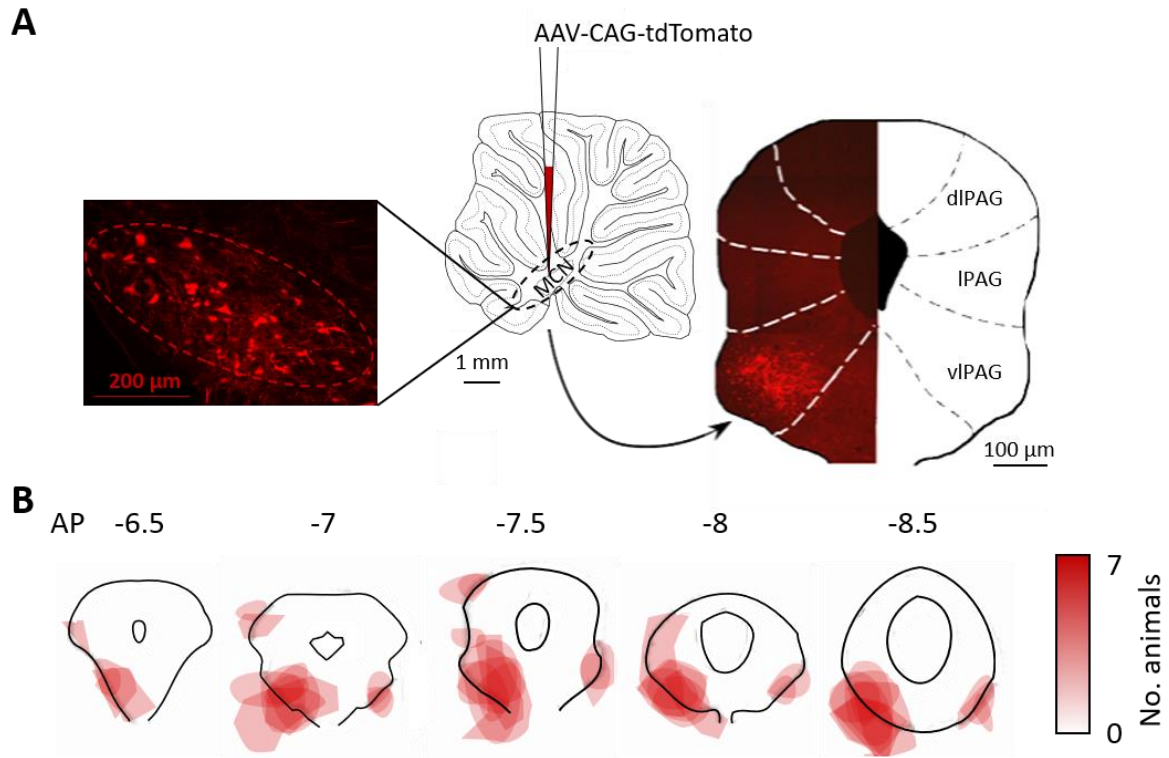

1

2 **Supplementary Figure 4. Anatomical mapping of the MCN-PAG pathway.** A) Schematic showing on a sagittal  
3 section of the cerebellum injection into the MCN of an anterograde tracer (AAV-CAG-tdTomato viral vector) to  
4 label direct projections to the PAG. Coronal section shows representative pattern of terminal labelling in the  
5 contralateral PAG in one animal (dIPAG, IPAG, vIPAG; dorsolateral, lateral and ventrolateral periaqueductal  
6 grey). B) Coronal sections of the PAG at different anteroposterior (AP) levels showing the pattern of terminal  
7 labelling in all available animals (n = 7 rats). The darker the shading the larger the number of animals with  
8 terminal labelling in that area.

9

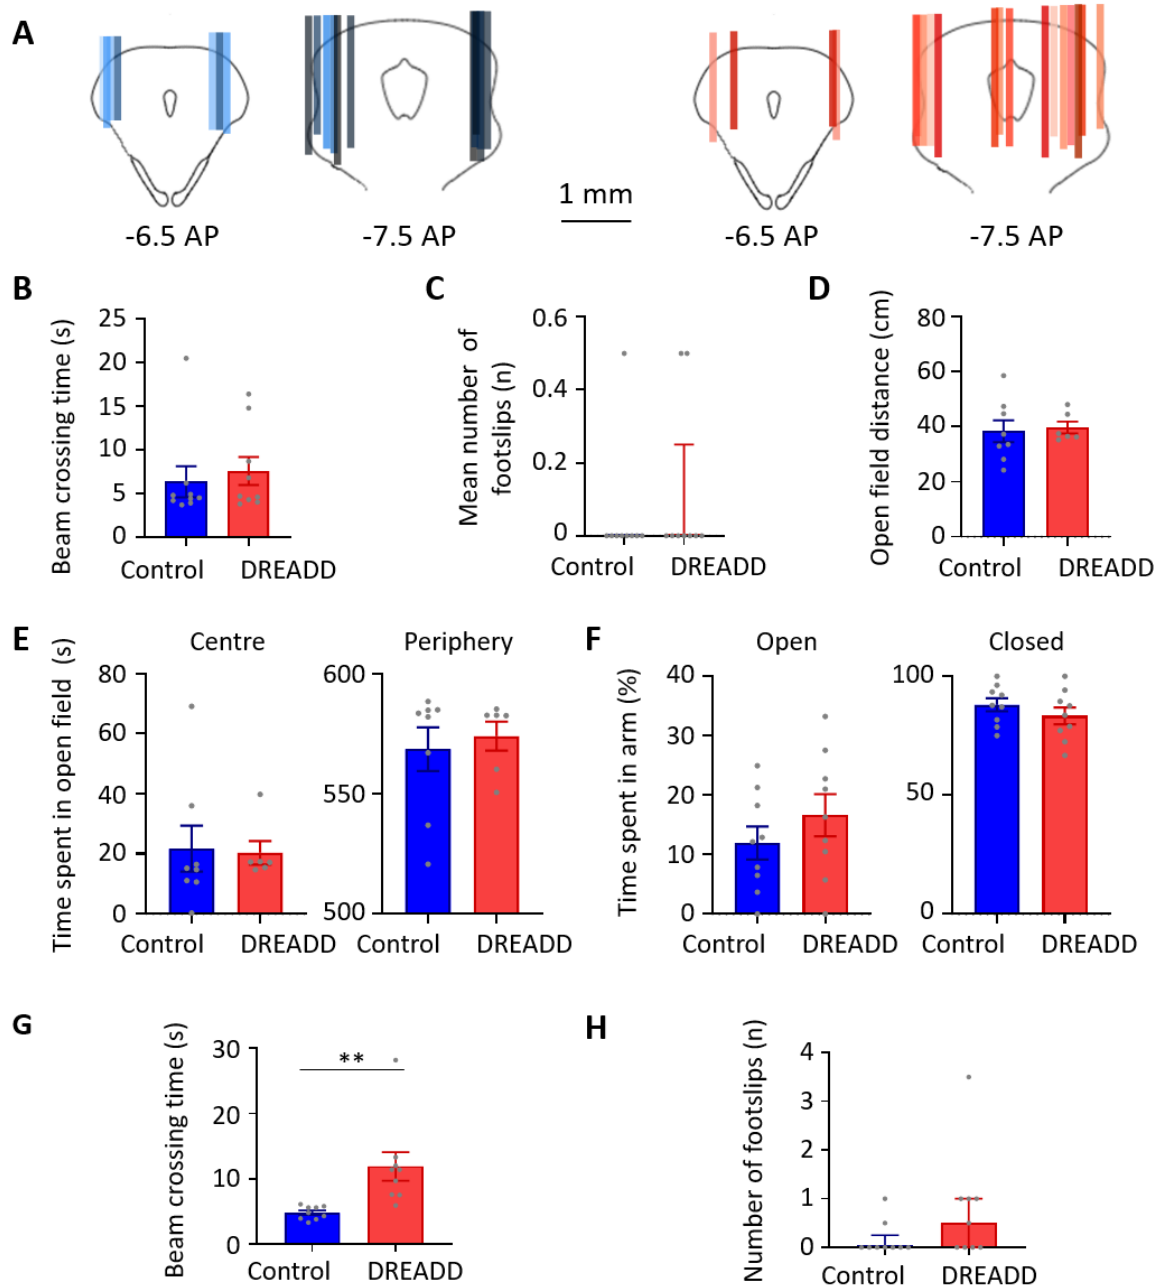

1

2 **Supplementary figure 5. Effect of DREADDs on general motor and affective behaviour.** A) Histological  
 3 identification of cannulae placement in PAG in control (n=9 rats, tracks colour coded blue to black for different  
 4 animals) and DREADD animals (n=10 rats, tracks colour coded orange to red for different animals). B) Beam  
 5 walking crossing times in control (n=9 rats) and DREADD (n=9 rats) experiments after infusion of CNO into vPAG.  
 6 Individual data points show mean crossing time per animal. Bars show mean  $\pm$  SEM C) Same as B but mean  
 7 number of footslips in control (n=9 rats) versus DREADD (n=9 rats) experiments. Individual data points show  
 8 mean number of footslips per animal. Bars show median & IQR. D) The total distance moved in an open field  
 9 arena in control (n=8 rats) versus DREADD (n=6 rats) experiments. Individual data points show total distance  
 10 per animal. Bars show mean  $\pm$  SEM. E) Time spent in the centre versus the periphery of the open field arena for  
 11 control versus DREADD animals. Individual data points show total time per animal. Bars show mean  $\pm$  SEM. F)  
 12 Percentage of the total time spent in the open arm (left) and in the closed arm (right) of an elevated plus maze  
 13 for control (n=9 rats) versus DREADD (n=9 rats) experiments. Individual data points show percentage time per  
 14 animal. Bars show mean  $\pm$  SEM. G) Effect of intraperitoneal injection of CNO on the total crossing time in the  
 15 beam walking task for DREADD (n=9 rats) versus control (n=9 rats) experiments. Individual data points show

- 1 time per animal. Bars show mean  $\pm$  SEM. Unpaired t-test \*\*,  $p < 0.001$ . H) Same as G but for the number of
- 2 footslips. Bars show mean  $\pm$  SEM.
